# Supplementary material for: Inputs and processes affecting the distribution of particulate iron in the North Atlantic along the GEOVIDE (GEOTRACES GA01) section
Source: Copernicus journal article supplement (doi:10.5194/bg-2018-234), 2018-05-28
Supplement: Supplementary file 1 [file bg-2018-234-supplement.pdf]

**Supplementary material**

**Table S1: PFe, PAI, PMn and PP concentrations (nmol L<sup>-1</sup>) at all stations during GEOVIDE.**

Concentrations are provided in two size fractions (>5µm and 0.45-5µm). Total concentrations can be obtained by summing both size fractions

| Station<br>[#] | Latitude<br>[°N] | Longitude<br>[°W] | Sampling<br>Date<br>(dd/mm/yy) | Bottom<br>Depth<br>(m) | PFe <sub>large</sub>    |             | PFe <sub>small</sub>    |             | PAI <sub>large</sub>    |             | PAI <sub>small</sub>    |             | PMn <sub>large</sub>    |     | PMn <sub>small</sub>    |     | PP <sub>large</sub>     |     | PP <sub>small</sub>     |     |                         |     |     |     |     |     |     |
|----------------|------------------|-------------------|--------------------------------|------------------------|-------------------------|-------------|-------------------------|-------------|-------------------------|-------------|-------------------------|-------------|-------------------------|-----|-------------------------|-----|-------------------------|-----|-------------------------|-----|-------------------------|-----|-----|-----|-----|-----|-----|
|                |                  |                   |                                |                        | [nmol L <sup>-1</sup> ] | SD          | [nmol L <sup>-1</sup> ] | SD  | [nmol L <sup>-1</sup> ] | SD  | [nmol L <sup>-1</sup> ] | SD  | [nmol L <sup>-1</sup> ] | SD  | [nmol L <sup>-1</sup> ] | SD  |     |     |     |     |     |
| 1              | 40.333           | -10.036           | 20/05/2014                     | 3590                   | 3575                    | 6.58 ± 0.72 | 0.06 ± 0.01             | 32.1 ± 3.5  | 0.29 ± 0.05             | 0.14 ± 0.02 | bdl                     | bdl         | bdl                     | bdl | bdl                     | bdl | bdl                     | bdl | bdl                     | bdl | bdl                     |     |     |     |     |     |     |
|                |                  |                   |                                |                        | 3400                    | 3.61 ± 0.37 | bdl                     | 18.4 ± 2.0  | bdl                     | 0.09 ± 0.01 | bdl                     | bdl         | bdl                     | bdl | bdl                     | bdl | bdl                     | bdl | bdl                     | bdl | bdl                     | bdl | bdl | bdl |     |     |     |
|                |                  |                   |                                |                        | 3253                    | 7.42 ± 0.82 | bdl                     | 35.9 ± 3.7  | bdl                     | 0.21 ± 0.02 | bdl                     | 0.64 ± 0.07 | bdl                     | bdl | bdl | bdl | bdl |     |     |
|                |                  |                   |                                |                        | 2999                    | 7.78 ± 0.87 | 0.02 ± 0.01             | 38.4 ± 4.3  | 0.23 ± 0.05             | 0.14 ± 0.02 | bdl                     | bdl         | bdl                     | bdl | bdl                     | bdl | bdl                     | bdl | bdl                     | bdl | bdl                     | bdl | bdl | bdl | bdl |     |     |
|                |                  |                   |                                |                        | 2501                    | 3.94 ± 0.43 | bdl                     | 18.6 ± 1.9  | bdl                     | 0.12 ± 0.01 | bdl                     | bdl         | bdl                     | bdl | bdl                     | bdl | bdl                     | bdl | bdl                     | bdl | bdl                     | bdl | bdl | bdl | bdl |     |     |
|                |                  |                   |                                |                        | 2001                    | 3.55 ± 0.37 | bdl                     | 16.3 ± 1.7  | bdl                     | 0.13 ± 0.01 | bdl                     | bdl         | bdl                     | bdl | bdl                     | bdl | bdl                     | bdl | bdl                     | bdl | bdl                     | bdl | bdl | bdl | bdl | bdl |     |
|                |                  |                   |                                |                        | 1599                    | 3.28 ± 0.36 | bdl                     | 14.8 ± 1.6  | bdl                     | 0.12 ± 0.02 | bdl                     | bdl         | bdl                     | bdl | bdl                     | bdl | bdl                     | bdl | bdl                     | bdl | bdl                     | bdl | bdl | bdl | bdl | bdl |     |
|                |                  |                   |                                |                        | 1400                    | bdl         | bdl                     | 0.00 ± 0.00 | bdl                     | bdl         | bdl                     | bdl         | bdl                     | bdl | bdl                     | bdl | bdl                     | bdl | bdl                     | bdl | bdl                     | bdl | bdl | bdl | bdl | bdl |     |
|                |                  |                   |                                |                        | 1198                    | 2.24 ± 0.25 | 0.00 ± 0.00             | 9.66 ± 1.18 | 0.01 ± 0.00             | 0.13 ± 0.02 | bdl                     | bdl         | bdl                     | bdl | bdl                     | bdl | bdl                     | bdl | bdl                     | bdl | bdl                     | bdl | bdl | bdl | bdl | bdl |     |
|                |                  |                   |                                |                        | 1001                    | 4.27 ± 0.52 | bdl                     | 19.4 ± 2.3  | bdl                     | 0.21 ± 0.02 | bdl                     | bdl         | bdl                     | bdl | bdl                     | bdl | bdl                     | bdl | bdl                     | bdl | bdl                     | bdl | bdl | bdl | bdl | bdl |     |
|                |                  |                   |                                |                        | 849                     | 4.14 ± 0.45 | bdl                     | 19.8 ± 2.6  | bdl                     | 0.17 ± 0.02 | bdl                     | bdl         | bdl                     | bdl | bdl                     | bdl | bdl                     | bdl | bdl                     | bdl | bdl                     | bdl | bdl | bdl | bdl | bdl |     |
|                |                  |                   |                                |                        | 700                     | 4.15 ± 0.50 | bdl                     | 20.3 ± 2.6  | bdl                     | 0.15 ± 0.02 | bdl                     | bdl         | bdl                     | bdl | bdl                     | bdl | bdl                     | bdl | bdl                     | bdl | bdl                     | bdl | bdl | bdl | bdl | bdl |     |
|                |                  |                   |                                |                        | 597                     | 5.55 ± 0.62 | 0.01 ± 0.00             | 26.3 ± 3.3  | bdl                     | 0.15 ± 0.02 | 0.00 ± 0.00             | 6.11 ± 0.72 | 2.64 ± 0.31             | bdl | bdl                     | bdl | bdl                     | bdl | bdl                     | bdl | bdl                     | bdl | bdl | bdl | bdl | bdl |     |
|                |                  |                   |                                |                        | 499                     | 3.67 ± 0.43 | bdl                     | 18.0 ± 2.1  | bdl                     | 0.08 ± 0.01 | bdl                     | bdl         | bdl                     | bdl | bdl                     | bdl | bdl                     | bdl | bdl                     | bdl | bdl                     | bdl | bdl | bdl | bdl | bdl | bdl |
|                |                  |                   |                                |                        | 400                     | 4.74 ± 0.65 | bdl                     | 23.1 ± 2.9  | bdl                     | 0.16 ± 0.02 | bdl                     | 6.42 ± 0.82 | bdl                     | bdl | bdl | bdl | bdl | bdl | bdl |
|                |                  |                   |                                |                        | 300                     | 8.36 ± 1.00 | 0.01 ± 0.00             | 39.9 ± 4.5  | 0.01 ± 0.01             | 0.24 ± 0.03 | bdl                     | 2.16 ± 0.26 | 0.09 ± 0.01             | bdl | bdl                     | bdl | bdl                     | bdl | bdl                     | bdl | bdl                     | bdl | bdl | bdl | bdl | bdl | bdl |
|                |                  |                   |                                |                        | 200                     | 6.54 ± 0.83 | bdl                     | 30.7 ± 3.8  | bdl                     | 0.26 ± 0.03 | bdl                     | 4.07 ± 0.47 | bdl                     | bdl | bdl | bdl | bdl | bdl | bdl |
|                |                  |                   |                                |                        | 150                     | 3.69 ± 0.40 | 0.00 ± 0.00             | 17.8 ± 2.0  | bdl                     | 0.29 ± 0.03 | bdl                     | 3.92 ± 0.43 | 0.53 ± 0.06             | bdl | bdl                     | bdl | bdl                     | bdl | bdl                     | bdl | bdl                     | bdl | bdl | bdl | bdl | bdl | bdl |
|                |                  |                   |                                |                        | 125                     | 2.19 ± 0.25 | bdl                     | 9.92 ± 1.13 | bdl                     | 0.22 ± 0.02 | bdl                     | 4.47 ± 0.48 | 1.18 ± 0.14             | bdl | bdl                     | bdl | bdl                     | bdl | bdl                     | bdl | bdl                     | bdl | bdl | bdl | bdl | bdl | bdl |
|                |                  |                   |                                |                        | 100                     | 2.20 ± 0.24 | bdl                     | 10.3 ± 1.1  | bdl                     | 0.20 ± 0.02 | bdl                     | 5.31 ± 0.61 | 1.46 ± 0.16             | bdl | bdl                     | bdl | bdl                     | bdl | bdl                     | bdl | bdl                     | bdl | bdl | bdl | bdl | bdl | bdl |
| 80             | 1.98 ± 0.22      | 0.03 ± 0.00       | 9.13 ± 1.04                    | bdl                    | 0.16 ± 0.02             | 0.00 ± 0.00 | 10.5 ± 1.2              | 4.50 ± 0.47 | bdl                     | bdl         | bdl                     | bdl         | bdl                     | bdl | bdl                     | bdl | bdl                     | bdl | bdl                     | bdl | bdl                     | bdl |     |     |     |     |     |
| 60             | 1.11 ± 0.11      | 0.00 ± 0.00       | 5.31 ± 0.57                    | bdl                    | 0.06 ± 0.01             | 0.00 ± 0.00 | 14.4 ± 1.5              | 5.07 ± 0.59 | bdl                     | bdl         | bdl                     | bdl         | bdl                     | bdl | bdl                     | bdl | bdl                     | bdl | bdl                     | bdl | bdl                     | bdl |     |     |     |     |     |
| 40             | 0.34 ± 0.04      | 0.03 ± 0.00       | 2.28 ± 0.23                    | bdl                    | 0.01 ± 0.00             | 0.01 ± 0.00 | 19.5 ± 2.1              | 12.6 ± 1.4  | bdl                     | bdl         | bdl                     | bdl         | bdl                     | bdl | bdl                     | bdl | bdl                     | bdl | bdl                     | bdl | bdl                     | bdl |     |     |     |     |     |
| 20             | 0.77 ± 0.08      | bdl               | 3.50 ± 0.36                    | bdl                    | 0.02 ± 0.00             | 0.01 ± 0.00 | 28.9 ± 3.1              | 9.25 ± 0.98 | bdl                     | bdl         | bdl                     | bdl         | bdl                     | bdl | bdl                     | bdl | bdl                     | bdl | bdl                     | bdl | bdl                     | bdl |     |     |     |     |     |
| 2              | 40.333           | -9.459            | 21/05/2014                     | 153.5                  | 139                     | 304 ± 34    | 0.84 ± 0.30             | 1540 ± 163  | 4.31 ± 1.35             | 2.50 ± 0.29 | 0.01 ± 0.00             | 20.0 ± 2.1  | 1.01 ± 0.12             | bdl | bdl                     | bdl | bdl                     | bdl | bdl                     | bdl | bdl                     | bdl | bdl |     |     |     |     |
|                |                  |                   |                                |                        | 120                     | 15.8 ± 1.6  | 0.03 ± 0.01             | 78.0 ± 8.3  | 0.18 ± 0.03             | 0.56 ± 0.07 | 0.00 ± 0.00             | 5.17 ± 0.58 | 1.97 ± 0.21             | bdl | bdl                     | bdl | bdl                     | bdl | bdl                     | bdl | bdl                     | bdl | bdl | bdl | bdl |     |     |
|                |                  |                   |                                |                        | 100                     | 6.26 ± 0.66 | 0.03 ± 0.00             | 30.5 ± 3.1  | 0.17 ± 0.02             | 0.32 ± 0.04 | 0.00 ± 0.00             | 5.12 ± 0.57 | 0.59 ± 0.06             | bdl | bdl                     | bdl | bdl                     | bdl | bdl                     | bdl | bdl                     | bdl | bdl | bdl | bdl | bdl |     |
|                |                  |                   |                                |                        | 75                      | 4.81 ± 0.50 | 0.05 ± 0.01             | 21.7 ± 2.2  | 0.03 ± 0.00             | 0.29 ± 0.03 | 0.00 ± 0.00             | 8.09 ± 0.89 | 3.57 ± 0.40             | bdl | bdl                     | bdl | bdl                     | bdl | bdl                     | bdl | bdl                     | bdl | bdl | bdl | bdl | bdl | bdl |
|                |                  |                   |                                |                        | 50                      | 1.79 ± 0.19 | 0.09 ± 0.02             | 7.84 ± 0.84 | 0.04 ± 0.01             | 0.20 ± 0.02 | 0.01 ± 0.00             | 14.1 ± 1.5  | 8.70 ± 0.94             | bdl | bdl                     | bdl | bdl                     | bdl | bdl                     | bdl | bdl                     | bdl | bdl | bdl | bdl | bdl | bdl |
|                |                  |                   |                                |                        | 36                      | 1.56 ± 0.17 | 0.07 ± 0.01             | 6.06 ± 0.67 | 0.23 ± 0.03             | 0.17 ± 0.02 | 0.01 ± 0.00             | 19.3 ± 2.0  | 8.97 ± 1.05             | bdl | bdl                     | bdl | bdl                     | bdl | bdl                     | bdl | bdl                     | bdl | bdl | bdl | bdl | bdl | bdl |
|                |                  |                   |                                |                        | 20                      | 1.83 ± 0.20 | 0.70 ± 0.08             | 6.65 ± 0.70 | 0.09 ± 0.01             | 0.12 ± 0.02 | 0.08 ± 0.01             | 21.0 ± 2.4  | 13.2 ± 1.4              | bdl | bdl                     | bdl | bdl                     | bdl | bdl                     | bdl | bdl                     | bdl | bdl | bdl | bdl | bdl | bdl |
| 4              | 40.333           | -9.767            | 21/05/2014                     | 804                    | 800                     | 10.7 ± 1.3  | 0.03 ± 0.01             | 48.3 ± 6.0  | 0.23 ± 0.04             | 0.28 ± 0.03 | 0.00 ± 0.00             | 1.68 ± 0.20 | 0.26 ± 0.03             | bdl | bdl                     | bdl | bdl                     | bdl | bdl                     | bdl | bdl                     | bdl | bdl |     |     |     |     |
|                |                  |                   |                                |                        | 700                     | 9.79 ± 1.22 | 0.03 ± 0.00             | 51.6 ± 5.7  | 1.36 ± 0.16             | 0.23 ± 0.02 | bdl                     | 0.97 ± 0.11 | bdl                     | bdl | bdl | bdl | bdl |     |     |
|                |                  |                   |                                |                        | 600                     | 11.8 ± 1.8  | 0.02 ± 0.00             | 59.6 ± 8.6  | 0.38 ± 0.06             | 0.25 ± 0.03 | bdl                     | 1.15 ± 0.15 | bdl                     | bdl | bdl | bdl | bdl | bdl |     |
|                |                  |                   |                                |                        | 501                     | 9.99 ± 1.23 | 0.01 ± 0.00             | 51.4 ± 5.9  | 0.09 ± 0.02             | 0.21 ± 0.03 | bdl                     | 2.03 ± 0.21 | 0.37 ± 0.04             | bdl | bdl                     | bdl | bdl                     | bdl | bdl                     | bdl | bdl                     | bdl | bdl | bdl | bdl | bdl |     |
|                |                  |                   |                                |                        | 400                     | 2.77 ± 0.36 | bdl                     | 13.4 ± 2.0  | 0.15 ± 0.02             | 0.16 ± 0.02 | bdl                     | 1.59 ± 0.18 | 0.18 ± 0.02             | bdl | bdl                     | bdl | bdl                     | bdl | bdl                     | bdl | bdl                     | bdl | bdl | bdl | bdl | bdl |     |
|                |                  |                   |                                |                        | 300                     | 2.37 ± 0.34 | 0.01 ± 0.00             | 11.7 ± 1.4  | 0.12 ± 0.02             | 0.17 ± 0.02 | bdl                     | 2.44 ± 0.29 | 1.08 ± 0.14             | bdl | bdl                     | bdl | bdl                     | bdl | bdl                     | bdl | bdl                     | bdl | bdl | bdl | bdl | bdl |     |
|                |                  |                   |                                |                        | 200                     | 4.52 ± 0.71 | 0.01 ± 0.00             | 22.8 ± 3.0  | 0.11 ± 0.02             | 0.21 ± 0.02 | bdl                     | 2.83 ± 0.33 | 1.38 ± 0.15             | bdl | bdl                     | bdl | bdl                     | bdl | bdl                     | bdl | bdl                     | bdl | bdl | bdl | bdl | bdl |     |
|                |                  |                   |                                |                        | 149                     | 3.07 ± 0.33 | 0.00 ± 0.00             | 15.6 ± 2.1  | 0.19 ± 0.02             | 0.19 ± 0.02 | bdl                     | 2.80 ± 0.34 | 1.05 ± 0.13             | bdl | bdl                     | bdl | bdl                     | bdl | bdl                     | bdl | bdl                     | bdl | bdl | bdl | bdl | bdl | bdl |
|                |                  |                   |                                |                        | 70                      | 1.33 ± 0.17 | 0.02 ± 0.00             | 7.14 ± 0.85 | 0.74 ± 0.09             | 0.07 ± 0.01 | bdl                     | 6.39 ± 0.68 | 3.81 ± 0.46             | bdl | bdl                     | bdl | bdl                     | bdl | bdl                     | bdl | bdl                     | bdl | bdl | bdl | bdl | bdl | bdl |
|                |                  |                   |                                |                        | 38                      | 0.57 ± 0.06 | 0.04 ± 0.01             | 3.08 ± 0.41 | 0.73 ± 0.09             | 0.02 ± 0.00 | 0.01 ± 0.00             | 12.2 ± 1.3  | 5.86 ± 0.71             | bdl | bdl                     | bdl | bdl                     | bdl | bdl                     | bdl | bdl                     | bdl | bdl | bdl | bdl | bdl | bdl |
| 20             | bdl              | 0.02 ± 0.00       | 0.34 ± 0.04                    | 0.17 ± 0.02            | bdl                     | bdl         | bdl                     | bdl         | bdl                     | bdl         | bdl                     | bdl         | bdl                     | bdl | bdl                     | bdl | bdl                     | bdl | bdl                     | bdl | bdl                     | bdl |     |     |     |     |     |
| 11             | 40.333           | -12.219           | 23/05/2014                     | 5360                   | 5347                    | 1.90 ± 0.22 | bdl                     | 10.4 ± 1.4  | 0.29 ± 0.03             | 0.07 ± 0.01 | bdl                     | bdl         | bdl                     | bdl | bdl                     | bdl | bdl                     | bdl | bdl                     | bdl | bdl                     | bdl | bdl |     |     |     |     |
|                |                  |                   |                                |                        | 5000                    | 1.38 ± 0.19 | 0.00 ± 0.00             | 7.41 ± 0.80 | 0.39 ± 0.04             | 0.05 ± 0.01 | bdl                     | bdl         | bdl                     | bdl | bdl                     | bdl | bdl                     | bdl | bdl                     | bdl | bdl                     | bdl | bdl | bdl | bdl |     |     |
|                |                  |                   |                                |                        | 4000                    | 1.01 ± 0.13 | bdl                     | 4.83 ± 0.49 | 0.18 ± 0.03             | 0.04 ± 0.01 | bdl                     | bdl         | bdl                     | bdl | bdl                     | bdl | bdl                     | bdl | bdl                     | bdl | bdl                     | bdl | bdl | bdl | bdl | bdl |     |
|                |                  |                   |                                |                        | 2998                    | 2.25 ± 0.28 | bdl                     | 10.5 ± 1.1  | 0.27 ± 0.03             | 0.07 ± 0.01 | bdl                     | bdl         | bdl                     | bdl | bdl                     | bdl | bdl                     | bdl | bdl                     | bdl | bdl                     | bdl | bdl | bdl | bdl | bdl | bdl |
|                |                  |                   |                                |                        | 2500                    | 7.74 ± 0.90 | bdl                     | 33.9 ± 3.8  | bdl                     | 0.19 ± 0.03 | bdl                     | bdl         | bdl                     | bdl | bdl                     | bdl | bdl                     | bdl | bdl                     | bdl | bdl                     | bdl | bdl | bdl | bdl | bdl | bdl |
|                |                  |                   |                                |                        | 2000                    | 4.86 ± 0.55 | bdl                     | 21.8 ± 2.4  | 0.53 ± 0.06             | 0.15 ± 0.02 | bdl                     | bdl         | bdl                     | bdl | bdl                     | bdl | bdl                     | bdl | bdl                     | bdl | bdl                     | bdl | bdl | bdl | bdl | bdl | bdl |
|                |                  |                   |                                |                        | 1599                    | 1.70 ± 0.24 | 0.08 ± 0.01             | 7.99 ± 1.01 | 0.67 ± 0.09             | 0.07 ± 0.01 | 0.00 ± 0.00             | bdl         | bdl                     | bdl | bdl                     | bdl | bdl                     | bdl | bdl                     | bdl | bdl                     | bdl | bdl | bdl | bdl | bdl | bdl |
|                |                  |                   |                                |                        | 1200                    | 1.23 ± 0.14 | 0.01 ± 0.00             | 5.37 ± 0.64 | 0.25 ± 0.03             | 0.08 ± 0.01 | bdl                     | bdl         | bdl                     | bdl | bdl                     | bdl | bdl                     | bdl | bdl                     | bdl | bdl                     | bdl | bdl | bdl | bdl | bdl | bdl |
|                |                  |                   |                                |                        | 1001                    | 1.18 ± 0.15 | bdl                     | 4.88 ± 0.62 | 0.20                    |             |                         |             |                         |     |                         |     |                         |     |                         |     |                         |     |     |     |     |     |     |

|    |        |         |            |      |      |             |             |              |             |             |             |             |             |
|----|--------|---------|------------|------|------|-------------|-------------|--------------|-------------|-------------|-------------|-------------|-------------|
|    |        |         |            |      | 15   | 0.15 ± 0.02 | 0.00 ± 0.00 | 1.56 ± 0.17  | bdl         | 0.04 ± 0.01 | 0.02 ± 0.00 | 54.6 ± 5.7  | 31.8 ± 4.0  |
| 15 | 42.581 | -15.461 | 26/05/2014 | 5135 | 5121 | 2.57 ± 0.32 | 0.01 ± 0.00 | 10.76 ± 1.46 | 0.25 ± 0.03 | 0.11 ± 0.01 | bdl         | 0.31 ± 0.03 | bdl         |
|    |        |         |            |      | 5004 | 1.97 ± 0.26 | 0.10 ± 0.01 | 8.01 ± 0.86  | 0.60 ± 0.09 | 0.09 ± 0.01 | 0.00 ± 0.00 | bdl         | bdl         |
|    |        |         |            |      | 4001 | 0.99 ± 0.11 | 0.00 ± 0.00 | 4.04 ± 0.50  | 0.20 ± 0.02 | 0.05 ± 0.01 | bdl         | bdl         | bdl         |
|    |        |         |            |      | 3001 | 1.13 ± 0.13 | bdl         | 4.75 ± 0.50  | 0.20 ± 0.02 | 0.08 ± 0.01 | bdl         | 0.34 ± 0.04 | bdl         |
|    |        |         |            |      | 2500 | 0.99 ± 0.13 | bdl         | 3.83 ± 0.49  | 0.20 ± 0.02 | 0.08 ± 0.01 | bdl         | 0.55 ± 0.06 | bdl         |
|    |        |         |            |      | 2000 | 1.06 ± 0.12 | 0.00 ± 0.00 | 3.88 ± 0.52  | 0.17 ± 0.02 | 0.09 ± 0.01 | bdl         | 0.35 ± 0.04 | bdl         |
|    |        |         |            |      | 1800 | 1.38 ± 0.17 | bdl         | 5.22 ± 0.59  | 0.27 ± 0.03 | 0.11 ± 0.01 | 0.00 ± 0.00 | 0.52 ± 0.06 | 0.03 ± 0.00 |
|    |        |         |            |      | 1600 |             | 0.00 ± 0.00 |              | 0.41 ± 0.05 |             | bdl         |             | bdl         |
|    |        |         |            |      | 1400 | 0.85 ± 0.12 | 0.01 ± 0.00 | 3.48 ± 0.37  | 0.23 ± 0.05 | 0.08 ± 0.01 | 0.00 ± 0.00 | 0.28 ± 0.04 | bdl         |
|    |        |         |            |      | 1100 | 1.00 ± 0.12 | 0.00 ± 0.00 | 3.86 ± 0.44  | 0.14 ± 0.02 | 0.10 ± 0.01 | bdl         | 0.64 ± 0.07 | bdl         |
|    |        |         |            |      | 1000 | 1.12 ± 0.14 | bdl         | 4.52 ± 0.57  | 0.17 ± 0.02 | 0.10 ± 0.01 | bdl         | 0.95 ± 0.12 | bdl         |
|    |        |         |            |      | 800  | 1.48 ± 0.18 | 0.08 ± 0.01 | 5.70 ± 0.62  | 0.50 ± 0.07 | 0.12 ± 0.02 | bdl         | 1.06 ± 0.13 | bdl         |
|    |        |         |            |      | 650  | 1.42 ± 0.18 | 0.00 ± 0.00 | 6.26 ± 0.78  | 0.32 ± 0.04 | 0.13 ± 0.01 | bdl         | 1.49 ± 0.16 | 0.15 ± 0.02 |
|    |        |         |            |      | 400  | 0.74 ± 0.08 | 0.01 ± 0.00 | 3.64 ± 0.42  | 0.30 ± 0.03 | 0.17 ± 0.02 | bdl         | 2.73 ± 0.31 | 0.99 ± 0.11 |
|    |        |         |            |      | 300  | 0.48 ± 0.06 | bdl         | 2.70 ± 0.30  | 0.40 ± 0.04 | 0.20 ± 0.02 | bdl         | 4.49 ± 0.53 | 1.60 ± 0.17 |
|    |        |         |            |      | 100  | 0.30 ± 0.03 | bdl         | 1.77 ± 0.20  | 0.19 ± 0.02 | 0.09 ± 0.01 | bdl         | 5.54 ± 0.67 | 0.44 ± 0.05 |
|    |        |         |            |      | 70.5 | 0.63 ± 0.08 | 0.03 ± 0.01 | 2.66 ± 0.35  | 0.50 ± 0.09 | 0.06 ± 0.01 | 0.03 ± 0.00 | 9.63 ± 1.27 | 6.60 ± 0.76 |
|    |        |         |            |      | 60.2 | 0.15 ± 0.02 | 0.02 ± 0.00 | 2.05 ± 0.23  | 0.43 ± 0.04 | 0.03 ± 0.01 | 0.02 ± 0.00 | 11.7 ± 1.5  | 8.59 ± 1.09 |
|    |        |         |            |      | 49.9 | 0.09 ± 0.01 | 0.03 ± 0.01 | 1.66 ± 0.23  | 0.91 ± 0.11 | 0.02 ± 0.00 | 0.02 ± 0.00 | 21.6 ± 2.9  | 14.7 ± 1.8  |
|    |        |         |            |      | 29.9 | 0.12 ± 0.02 | 0.07 ± 0.01 | 1.76 ± 0.21  | 1.06 ± 0.12 | 0.06 ± 0.04 | 0.03 ± 0.01 | 37.5 ± 4.6  | 24.0 ± 2.6  |
|    |        |         |            |      | 20.1 | 0.14 ± 0.02 | 0.04 ± 0.01 | 1.44 ± 0.18  | 0.90 ± 0.11 | 0.03 ± 0.00 | 0.02 ± 0.00 | 27.1 ± 4.0  | 19.5 ± 2.5  |
| 17 | 43.780 | -17.031 | 27/05/2014 | 4080 | 4062 | 1.14 ± 0.17 | 0.00 ± 0.00 | 4.93 ± 0.55  | 0.46 ± 0.05 | 0.12 ± 0.01 | bdl         | 0.18 ± 0.02 | bdl         |
|    |        |         |            |      | 3500 | 0.66 ± 0.08 | 0.10 ± 0.01 | 2.85 ± 0.34  | 0.53 ± 0.07 | 0.07 ± 0.01 | 0.00 ± 0.00 | bdl         | bdl         |
|    |        |         |            |      | 3000 | 0.65 ± 0.08 | bdl         | 2.89 ± 0.34  | 0.34 ± 0.05 | 0.08 ± 0.01 | bdl         | bdl         | bdl         |
|    |        |         |            |      | 2500 | 0.83 ± 0.12 | 0.01 ± 0.00 | 3.38 ± 0.39  | 0.54 ± 0.06 | 0.09 ± 0.01 | bdl         | bdl         | bdl         |
|    |        |         |            |      | 2002 | 0.71 ± 0.08 | 0.04 ± 0.01 | 2.58 ± 0.28  | 0.64 ± 0.09 | 0.10 ± 0.01 | bdl         | 0.21 ± 0.02 | bdl         |
|    |        |         |            |      | 1800 | 0.62 ± 0.09 | 0.01 ± 0.00 | 2.33 ± 0.32  | 0.80 ± 0.09 | 0.09 ± 0.01 | bdl         | bdl         | bdl         |
|    |        |         |            |      | 1600 | 0.81 ± 0.11 | bdl         | 3.83 ± 0.43  | 0.28 ± 0.04 | 0.10 ± 0.01 | bdl         | 0.56 ± 0.06 | bdl         |
|    |        |         |            |      | 1400 | 0.50 ± 0.05 | bdl         | 2.05 ± 0.22  | 0.34 ± 0.04 | 0.08 ± 0.01 | bdl         | 0.20 ± 0.02 | bdl         |
|    |        |         |            |      | 1200 | 0.54 ± 0.08 | bdl         | 2.45 ± 0.25  | 0.31 ± 0.03 | 0.08 ± 0.01 | bdl         | 0.08 ± 0.01 | bdl         |
|    |        |         |            |      | 1000 | 0.69 ± 0.08 |             | 2.72 ± 0.31  |             | 0.10 ± 0.01 |             | 0.83 ± 0.10 |             |
|    |        |         |            |      | 800  | 0.74 ± 0.09 | bdl         | 3.27 ± 0.39  | 0.25 ± 0.03 | 0.11 ± 0.02 | bdl         | 0.79 ± 0.12 | bdl         |
|    |        |         |            |      | 600  | 0.98 ± 0.13 | 0.03 ± 0.00 | 3.78 ± 0.42  | 0.34 ± 0.04 | 0.12 ± 0.01 | bdl         | 1.68 ± 0.23 | 0.33 ± 0.04 |
|    |        |         |            |      | 500  | 0.53 ± 0.06 | bdl         | 2.77 ± 0.32  | 0.29 ± 0.03 | 0.11 ± 0.01 | bdl         | 2.19 ± 0.23 | 0.54 ± 0.07 |
|    |        |         |            |      | 400  | 0.63 ± 0.08 | bdl         | 3.19 ± 0.34  | 0.33 ± 0.04 | 0.16 ± 0.02 | bdl         | 2.90 ± 0.32 | 0.73 ± 0.09 |
|    |        |         |            |      | 351  | 0.44 ± 0.05 | bdl         | 2.51 ± 0.29  | 0.31 ± 0.04 | 0.16 ± 0.02 | bdl         | 2.75 ± 0.29 | 0.95 ± 0.13 |
|    |        |         |            |      | 200  | 0.25 ± 0.04 | 0.03 ± 0.00 | 1.64 ± 0.19  | 0.56 ± 0.06 | 0.07 ± 0.01 | bdl         | 3.59 ± 0.47 | 0.18 ± 0.02 |
|    |        |         |            |      | 100  | 0.11 ± 0.01 | 0.02 ± 0.00 | 1.33 ± 0.15  | 0.33 ± 0.04 | 0.04 ± 0.00 | 0.01 ± 0.00 | 5.52 ± 0.65 | 3.08 ± 0.34 |
|    |        |         |            |      | 70   | 0.14 ± 0.01 | 0.02 ± 0.00 | 1.19 ± 0.12  | 0.58 ± 0.07 | 0.01 ± 0.00 | 0.01 ± 0.00 | 12.3 ± 1.4  | 7.13 ± 0.89 |
|    |        |         |            |      | 60   | 0.24 ± 0.03 | 0.04 ± 0.01 | 1.80 ± 0.21  | 0.86 ± 0.09 | 0.02 ± 0.00 | 0.01 ± 0.00 | 20.4 ± 2.5  | 14.8 ± 1.8  |
|    |        |         |            |      | 45   | 0.08 ± 0.01 | 0.02 ± 0.00 | 1.39 ± 0.17  | 0.71 ± 0.08 | 0.03 ± 0.00 | 0.03 ± 0.00 | 29.9 ± 3.4  | 23.7 ± 2.7  |
|    |        |         |            |      | 30   | 0.07 ± 0.09 | 0.01 ± 0.00 | 2.55 ± 0.46  | 0.96 ± 0.12 | 0.04 ± 0.01 | 0.04 ± 0.01 | 42.0 ± 2.6  | 28.7 ± 3.0  |
|    |        |         |            |      | 15   | 0.17 ± 0.02 | 0.02 ± 0.00 | 1.94 ± 0.22  | 1.01 ± 0.12 | 0.04 ± 0.01 | 0.04 ± 0.01 | 36.5 ± 4.2  | 29.6 ± 3.8  |
| 19 | 45.051 | -18.505 | 28/05/2014 | 4640 | 4625 | 1.40 ± 0.00 | bdl         | 5.43 ± 0.03  | 0.29 ± 0.28 | 0.13 ± 0.00 | bdl         | 0.46 ± 0.04 | bdl         |
|    |        |         |            |      | 3999 | 0.70 ± 0.00 | 0.01 ± 0.09 | 2.61 ± 0.03  | 0.28 ± 0.29 | 0.07 ± 0.00 | bdl         | bdl         | bdl         |
|    |        |         |            |      | 3000 | 0.71 ± 0.01 | bdl         | 2.54 ± 0.29  | 0.33 ± 0.04 | 0.08 ± 0.01 | bdl         | 0.04 ± 5.36 | bdl         |
|    |        |         |            |      | 2500 | 0.52 ± 0.06 | 0.00 ± 0.00 | 1.84 ± 0.21  | 0.19 ± 0.02 | 0.07 ± 0.01 | bdl         | 0.02 ± 0.00 | bdl         |
|    |        |         |            |      | 2000 |             | bdl         |              | 0.26 ± 0.04 |             | 0.00 ± 0.00 |             | bdl         |
|    |        |         |            |      | 1800 | 0.75 ± 0.08 | bdl         | 2.76 ± 0.32  | 0.22 ± 0.03 | 0.11 ± 0.01 | bdl         | 0.30 ± 0.03 | bdl         |
|    |        |         |            |      | 1601 | 0.59 ± 0.07 | bdl         | 2.11 ± 0.28  | 0.29 ± 0.03 | 0.10 ± 0.02 | bdl         | 0.26 ± 0.03 | bdl         |
|    |        |         |            |      | 1402 | 0.56 ± 0.07 | bdl         | 2.06 ± 0.28  | 0.16 ± 0.02 | 0.09 ± 0.01 | bdl         | 0.50 ± 0.06 | bdl         |
|    |        |         |            |      | 1200 | 0.53 ± 0.09 | bdl         | 2.29 ± 0.27  | 0.26 ± 0.03 | 0.08 ± 0.01 | bdl         | 0.38 ± 0.05 | bdl         |
|    |        |         |            |      | 1000 | 0.62 ± 0.08 | bdl         | 2.45 ± 0.27  | 0.18 ± 0.02 | 0.10 ± 0.01 | bdl         | 3.16 ± 0.35 | 0.25 ± 0.03 |
|    |        |         |            |      | 800  | 0.57 ± 0.06 | 0.00 ± 0.00 | 2.02 ± 0.21  | 0.24 ± 0.03 | 0.12 ± 0.02 | bdl         | 1.19 ± 0.15 | bdl         |
|    |        |         |            |      | 600  | 0.27 ± 0.04 | bdl         | 1.31 ± 0.16  | 0.04 ± 0.00 | 0.12 ± 0.01 | bdl         | 1.18 ± 0.16 | 0.31 ± 0.04 |
|    |        |         |            |      | 500  | 0.36 ± 0.04 | 0.01 ± 0.00 | 2.05 ± 0.27  | 0.04 ± 0.00 | 0.12 ± 0.02 | bdl         | 2.64 ± 0.37 | 0.93 ± 0.14 |
|    |        |         |            |      | 401  | 0.39 ± 0.07 | 0.01 ± 0.00 | 1.67 ± 0.21  | 0.08 ± 0.01 | 0.10 ± 0.02 | bdl         | 3.00 ± 0.39 | 0.92 ± 0.12 |
|    |        |         |            |      | 300  | 0.23 ± 0.03 | 0.00 ± 0.00 | 1.18 ± 0.13  | 0.06 ± 0.01 | 0.08 ± 0.01 | bdl         | 1.96 ± 0.27 | 1.15 ± 0.17 |
|    |        |         |            |      | 201  | 0.22 ± 0.03 | 1.08 ± 0.14 | 1.49 ± 0.19  | 0.04 ± 0.00 | 0.09 ± 0.01 | 0.00 ± 0.00 | 4.46 ± 0.46 | 2.40 ± 0.30 |
|    |        |         |            |      | 100  | 0.31 ± 0.04 | 0.01 ± 0.00 | 1.57 ± 0.22  | 0.04 ± 0.00 | 0.08 ± 0.01 | 0.00 ± 0.00 | 5.36 ± 0.71 | 2.90 ± 0.37 |
|    |        |         |            |      | 50   | 0.11 ± 0.02 | 0.02 ± 0.00 | 0.88 ± 0.15  | 0.11 ± 0.01 | 0.02 ± 0.00 | 0.02 ± 0.00 | 20.7 ± 2.4  | 14.9 ± 2.0  |
|    |        |         |            |      | 40   | 0.04 ± 0.00 | 0.01 ± 0.00 | 0.56 ± 0.07  | 0.16 ± 0.02 | 0.01 ± 0.00 | 0.02 ± 0.00 | 18.2 ± 2.5  | 18.8 ± 2.2  |
|    |        |         |            |      | 30   | 0.05 ± 0.01 | 0.02 ± 0.00 | 0.77 ± 0.09  | 0.12 ± 0.01 | 0.02 ± 0.00 | 0.02 ± 0.00 | 22.5 ± 3.4  | 19.8 ± 2.5  |
|    |        |         |            |      | 20   | 0.03 ± 0.00 | 0.01 ± 0.00 | 0.76 ± 0.08  | 0.18 ± 0.02 | 0.02 ± 0.00 | 0.02 ± 0.00 | 26.5 ± 3.0  | 17.6 ± 2.1  |
| 21 | 46.544 | -19.672 | 01/06/2014 | 4607 | 4592 | 2.44 ± 0.27 | 0.01 ± 0.00 | 8.89 ± 0.94  | 0.02 ± 0.00 | 0.19 ± 0.02 | 0.00 ± 0.00 | 0.57 ± 0.07 | bdl         |
|    |        |         |            |      | 4499 | 2.47 ± 0.31 | 0.02 ± 0.00 | 8.67 ± 0.94  | 0.03 ± 0.01 | 0.19 ± 0.02 | 0.00 ± 0.00 | 0.63 ± 0.08 | bdl         |
|    |        |         |            |      | 3500 | 0.78 ± 0.08 | 0.02 ± 0.00 | 2.55 ± 0.27  | 0.05 ± 0.01 | 0.10 ± 0.01 | 0.00 ± 0.00 | 0.40 ± 0.05 | 0.03 ± 0.00 |
|    |        |         |            |      | 2999 | 0.84 ± 0.09 | 0.01 ± 0.00 | 2.19 ± 0.22  | 0.02 ± 0.00 | 0.12 ± 0.01 | 0.00 ± 0.00 | 0.76 ± 0.09 | 0.16 ± 0.02 |
|    |        |         |            |      | 2800 | 1.13 ± 0.12 | 0.01 ± 0.00 | 2.78 ± 0.31  | 0.07 ± 0.01 | 0.13 ± 0.01 | 0.00 ± 0.00 | 0.92 ± 0.10 | 0.14 ± 0.01 |
|    |        |         |            |      | 2299 | 0.84 ± 0.10 | 0.01 ± 0.00 | 2.22 ± 0.23  | bdl         | 0.13 ± 0.01 | 0.00 ± 0.00 | 1.13 ± 0.14 | 0.41 ± 0.05 |
|    |        |         |            |      | 2001 | 0.78 ± 0.10 | 0.00 ± 0.00 | 2.10 ± 0.24  | bdl         | 0.13 ± 0.02 | 0.00 ± 0.00 | 1.17 ± 0.15 | 0.51 ± 0.06 |
|    |        |         |            |      | 1501 | 0.80 ± 0.08 | 0.01 ± 0.00 | 2.23 ± 0.24  | 0.02 ± 0.00 | 0.11 ± 0.02 | 0.00 ± 0.00 | 2.03 ± 0.24 | 0.27 ± 0.04 |
|    |        |         |            |      | 1250 | 0.68 ± 0.08 | 0.01 ± 0.00 | 2.31 ± 0.26  | 0.01 ± 0.00 | 0.12 ± 0.01 | 0.00 ± 0.00 | 1.40 ± 0.17 | 0.47 ± 0.06 |
|    |        |         |            |      | 1000 | 0.59 ± 0.07 | 0.01 ± 0.00 | 2.10 ± 0.22  | 0.00 ± 0.00 | 0.12 ± 0.01 | 0.00 ± 0.00 | 1.14 ± 0.13 | 0.76 ± 0.09 |
|    |        |         |            |      | 799  | 0.61 ± 0.07 | 0.00 ± 0.00 | 2.33 ± 0.25  | bdl         | 0.15 ± 0.02 | 0.00 ± 0.00 | 2.02 ± 0.22 | 0.73 ± 0.08 |
|    |        |         |            |      | 700  | 0.59 ± 0.07 | 0.01 ± 0.00 | 2.42 ± 0.26  | 0.01 ± 0.00 | 0.14 ± 0.02 | 0.00 ± 0.00 | 2.64 ± 0.29 | 1.17 ± 0.13 |
|    |        |         |            |      | 600  | 0.37 ± 0.04 | 0.00 ± 0.00 | 1.96 ± 0.21  | 0.05 ± 0.01 | 0.11 ± 0.01 | 0.00 ± 0.00 | 2.96 ± 0.35 | 1.57 ± 0.22 |
|    |        |         |            |      |      |             |             |              |             |             |             |             |             |

|    |        |         |            |      |      |             |             |              |             |             |             |             |             |
|----|--------|---------|------------|------|------|-------------|-------------|--------------|-------------|-------------|-------------|-------------|-------------|
|    |        |         |            |      | 1800 | 0.80 ± 0.10 | 0.00 ± 0.00 | 1.85 ± 0.21  | 0.04 ± 0.00 | 0.12 ± 0.01 | 0.00 ± 0.00 | 0.70 ± 0.08 | 0.07 ± 0.01 |
|    |        |         |            |      | 1600 | 0.68 ± 0.09 | bdl         | 1.79 ± 0.18  | 0.02 ± 0.00 | 0.12 ± 0.02 | bdl         | 0.62 ± 0.09 | 0.04 ± 0.01 |
|    |        |         |            |      | 1400 | 0.71 ± 0.09 | 0.01 ± 0.00 | 1.90 ± 0.22  | 0.08 ± 0.01 | 0.12 ± 0.02 | 0.00 ± 0.00 | 0.74 ± 0.08 | 0.01 ± 0.00 |
|    |        |         |            |      | 1200 | 0.76 ± 0.09 | 0.01 ± 0.00 | 1.77 ± 0.21  | 0.06 ± 0.01 | 0.11 ± 0.01 | bdl         | 0.74 ± 0.08 | 0.07 ± 0.01 |
|    |        |         |            |      | 800  | 0.44 ± 0.06 | bdl         | 1.60 ± 0.21  | 0.01 ± 0.00 | 0.12 ± 0.02 | bdl         | 1.09 ± 0.15 | 0.08 ± 0.01 |
|    |        |         |            |      | 400  | 0.23 ± 0.03 | 0.00 ± 0.00 | 1.27 ± 0.15  | 0.02 ± 0.00 | 0.11 ± 0.02 | bdl         | 2.26 ± 0.24 | 1.60 ± 0.19 |
|    |        |         |            |      | 200  | 0.17 ± 0.02 | 0.00 ± 0.00 | 1.28 ± 0.14  | 0.03 ± 0.00 | 0.09 ± 0.01 | bdl         | 2.97 ± 0.33 | 1.86 ± 0.22 |
|    |        |         |            |      | 100  | 0.22 ± 0.03 | 0.02 ± 0.00 | 1.98 ± 0.32  | 0.11 ± 0.01 | 0.11 ± 0.01 | bdl         | 6.76 ± 1.03 | 5.77 ± 0.63 |
|    |        |         |            |      | 70   | 0.18 ± 0.02 | 0.01 ± 0.00 | 1.95 ± 0.21  | 0.07 ± 0.01 | 0.02 ± 0.00 | 0.03 ± 0.00 | 12.2 ± 1.6  | 11.2 ± 1.1  |
|    |        |         |            |      | 60   | 0.12 ± 0.02 | 0.01 ± 0.00 | 2.07 ± 0.23  | 0.14 ± 0.02 | 0.02 ± 0.00 | 0.01 ± 0.00 | 12.6 ± 1.4  | 8.29 ± 0.91 |
|    |        |         |            |      | 40   | 0.21 ± 0.03 | 0.11 ± 0.01 | 2.76 ± 0.32  | 1.02 ± 0.13 | 0.04 ± 0.01 | 0.02 ± 0.00 | 25.3 ± 3.1  | 9.40 ± 1.15 |
|    |        |         |            |      | 30   | 0.16 ± 0.02 | 0.05 ± 0.01 | 2.72 ± 0.35  | 0.27 ± 0.03 | 0.06 ± 0.01 | 0.06 ± 0.01 | 39.9 ± 4.6  | 31.7 ± 3.2  |
|    |        |         |            |      | 20   | 0.25 ± 0.04 | 0.04 ± 0.01 | 2.39 ± 0.27  | 0.16 ± 0.02 | 0.07 ± 0.01 | 0.05 ± 0.01 | 44.5 ± 5.4  | 29.8 ± 3.7  |
| 25 | 49.529 | -22.017 | 03/06/2014 | 4168 | 4269 | 3.86 ± 0.47 | 0.02 ± 0.00 | 15.68 ± 1.82 | 0.21 ± 0.02 | 0.37 ± 0.04 | bdl         | 0.76 ± 0.10 | bdl         |
|    |        |         |            |      | 4000 | 2.11 ± 0.25 | bdl         | 7.81 ± 0.90  | 0.05 ± 0.01 | 0.23 ± 0.03 | bdl         | 0.73 ± 0.08 | bdl         |
|    |        |         |            |      | 3500 | 1.20 ± 0.15 | bdl         | 3.93 ± 0.47  | 0.04 ± 0.00 | 0.15 ± 0.02 | bdl         | 0.33 ± 0.04 | bdl         |
|    |        |         |            |      | 3000 | 1.27 ± 0.15 | bdl         | 3.75 ± 0.43  | 0.05 ± 0.01 | 0.16 ± 0.02 | bdl         | 0.84 ± 0.11 | bdl         |
|    |        |         |            |      | 2600 | 1.13 ± 0.14 | 0.01 ± 0.00 | 2.52 ± 0.29  | 0.07 ± 0.01 | 0.13 ± 0.01 | bdl         | 0.49 ± 0.07 | bdl         |
|    |        |         |            |      | 2000 | 0.72 ± 0.10 | 0.00 ± 0.00 | 2.70 ± 0.32  | 0.06 ± 0.01 | 0.11 ± 0.02 | bdl         | 0.61 ± 0.08 | bdl         |
|    |        |         |            |      | 1800 | 0.83 ± 0.12 | 0.05 ± 0.01 | 2.38 ± 0.26  | 0.08 ± 0.01 | 0.13 ± 0.02 | bdl         | 0.60 ± 0.07 | bdl         |
|    |        |         |            |      | 1600 | 0.82 ± 0.12 | bdl         | 2.40 ± 0.32  | 0.06 ± 0.01 | 0.14 ± 0.02 | bdl         | 0.91 ± 0.12 | bdl         |
|    |        |         |            |      | 1400 | 0.79 ± 0.13 | bdl         | 2.33 ± 0.33  | 0.02 ± 0.00 | 0.14 ± 0.02 | bdl         | 0.75 ± 0.10 | bdl         |
|    |        |         |            |      | 1200 | 0.61 ± 0.08 | 0.01 ± 0.00 | 2.00 ± 0.28  | 0.04 ± 0.01 | 0.13 ± 0.02 | bdl         | 0.95 ± 0.11 | bdl         |
|    |        |         |            |      | 1000 | 0.65 ± 0.08 | 0.00 ± 0.00 | 2.09 ± 0.24  | 0.07 ± 0.01 | 0.16 ± 0.02 | bdl         | 0.91 ± 0.11 | 0.08 ± 0.01 |
|    |        |         |            |      | 800  | 0.51 ± 0.06 | bdl         | 2.45 ± 0.26  | 0.02 ± 0.00 | 0.12 ± 0.02 | bdl         | 1.43 ± 0.16 | 0.27 ± 0.03 |
|    |        |         |            |      | 650  | 0.40 ± 0.06 | 0.00 ± 0.00 | 1.92 ± 0.24  | 0.05 ± 0.01 | 0.12 ± 0.01 | bdl         | 1.86 ± 0.20 | 0.57 ± 0.08 |
|    |        |         |            |      | 499  | 0.32 ± 0.06 | 0.02 ± 0.00 | 1.72 ± 0.23  | 0.25 ± 0.03 | 0.11 ± 0.02 | 0.00 ± 0.00 | 5.24 ± 0.64 | 1.81 ± 0.23 |
|    |        |         |            |      | 349  | 0.02 ± 0.00 | 0.00 ± 0.00 | 0.66 ± 0.07  | 0.02 ± 0.00 | 0.03 ± 0.00 | bdl         | 1.79 ± 0.24 | 0.39 ± 0.04 |
|    |        |         |            |      | 200  | 0.13 ± 0.02 | 0.01 ± 0.00 | 0.99 ± 0.11  | 0.07 ± 0.01 | 0.04 ± 0.01 | bdl         | 1.31 ± 0.15 | 0.61 ± 0.06 |
|    |        |         |            |      | 100  | 0.17 ± 0.02 | 0.01 ± 0.00 | 1.60 ± 0.17  | 0.15 ± 0.02 | 0.03 ± 0.00 | 0.00 ± 0.00 | 5.23 ± 0.62 | 2.48 ± 0.39 |
|    |        |         |            |      | 75   | 0.10 ± 0.01 | 0.06 ± 0.01 | 1.43 ± 0.18  | 0.13 ± 0.01 | 0.01 ± 0.00 | 0.01 ± 0.00 | 14.9 ± 1.8  | 8.38 ± 1.03 |
|    |        |         |            |      | 50   | 0.11 ± 0.01 | 0.04 ± 0.01 | 1.40 ± 0.17  | 0.17 ± 0.02 | 0.01 ± 0.00 | 0.02 ± 0.00 | 13.8 ± 1.6  | 14.5 ± 1.7  |
|    |        |         |            |      | 35   | 0.40 ± 0.05 | 0.01 ± 0.00 | 2.04 ± 0.22  | 0.06 ± 0.01 | 0.02 ± 0.00 | 0.02 ± 0.00 | 22.9 ± 2.6  | 20.0 ± 2.2  |
|    |        |         |            |      | 25   | 0.22 ± 0.03 | 0.03 ± 0.00 | 1.68 ± 0.22  | 0.20 ± 0.03 | 0.08 ± 0.01 | 0.06 ± 0.01 | 62.4 ± 9.1  | 39.9 ± 4.6  |
|    |        |         |            |      | 15   | 0.27 ± 0.03 | 0.08 ± 0.01 | 1.50 ± 0.18  | 0.14 ± 0.02 | 0.14 ± 0.02 | 0.03 ± 0.00 | 89.9 ± 10.9 | 21.2 ± 2.6  |
| 26 | 50.278 | -22.605 | 04/06/2014 | 4207 | 4192 | 8.47 ± 1.04 | 0.01 ± 0.00 | 40.7 ± 4.2   | 0.07 ± 0.01 | 0.92 ± 0.10 | 0.00 ± 0.00 | 2.92 ± 0.31 | 0.11 ± 0.01 |
|    |        |         |            |      | 4000 | 0.75 ± 0.09 | 0.02 ± 0.00 | 3.26 ± 0.33  | 0.10 ± 0.01 | 0.08 ± 0.01 | 0.00 ± 0.00 | bdl         | bdl         |
|    |        |         |            |      | 3000 | 1.14 ± 0.12 | bdl         | 3.46 ± 0.36  | bdl         | 0.15 ± 0.02 | 0.00 ± 0.00 | 3.51 ± 0.39 | 0.34 ± 0.04 |
|    |        |         |            |      | 2300 | 0.97 ± 0.40 | 0.00 ± 0.00 | 2.45 ± 0.90  | 0.04 ± 0.00 | 0.12 ± 0.02 | 0.00 ± 0.00 | 0.26 ± 0.09 | bdl         |
|    |        |         |            |      | 2000 | 0.92 ± 0.10 | 0.02 ± 0.00 | 2.76 ± 0.25  | 0.28 ± 0.03 | 0.13 ± 0.01 | 0.00 ± 0.00 | 0.13 ± 0.03 | bdl         |
|    |        |         |            |      | 1600 | 1.00 ± 0.09 | 0.02 ± 0.06 | 2.67 ± 0.31  | bdl         | 0.14 ± 0.02 | 0.00 ± 0.01 | 0.41 ± 0.02 | bdl         |
|    |        |         |            |      | 1400 | 0.72 ± 0.08 | bdl         | 1.95 ± 0.20  | bdl         | 0.12 ± 0.01 | 0.00 ± 0.00 | 0.99 ± 0.11 | bdl         |
|    |        |         |            |      | 1200 | 0.74 ± 0.08 | bdl         | 2.58 ± 0.27  | bdl         | 0.14 ± 0.02 | 0.00 ± 0.00 | 0.97 ± 0.10 | 0.01 ± 0.00 |
|    |        |         |            |      | 1000 | 0.61 ± 0.07 | bdl         | 1.95 ± 0.20  | bdl         | 0.13 ± 0.01 | 0.00 ± 0.00 | 1.34 ± 0.14 | 0.02 ± 0.00 |
|    |        |         |            |      | 900  | 0.60 ± 0.07 | 0.00 ± 0.00 | 2.08 ± 0.22  | 0.03 ± 0.00 | 0.14 ± 0.02 | 0.00 ± 0.00 | 1.56 ± 0.17 | 0.42 ± 0.05 |
|    |        |         |            |      | 750  | 0.70 ± 0.08 | bdl         | 2.60 ± 0.28  | bdl         | 0.16 ± 0.02 | 0.00 ± 0.00 | 1.46 ± 0.16 | 0.28 ± 0.03 |
|    |        |         |            |      | 600  | 0.58 ± 0.06 | bdl         | 2.53 ± 0.26  | bdl         | 0.14 ± 0.02 | 0.00 ± 0.00 | 2.13 ± 0.24 | bdl         |
|    |        |         |            |      | 500  | 0.43 ± 0.05 | bdl         | 1.91 ± 0.20  | bdl         | 0.13 ± 0.01 | 0.00 ± 0.00 | 2.49 ± 0.26 | 1.05 ± 0.11 |
|    |        |         |            |      | 400  | 0.33 ± 0.04 | 0.00 ± 0.00 | 1.32 ± 0.14  | bdl         | 0.12 ± 0.01 | 0.00 ± 0.00 | 2.53 ± 0.31 | 1.11 ± 0.12 |
|    |        |         |            |      | 300  | 0.26 ± 0.03 | 0.00 ± 0.00 | 1.38 ± 0.15  | bdl         | 0.11 ± 0.01 | 0.00 ± 0.00 | 2.23 ± 0.24 | 0.71 ± 0.08 |
|    |        |         |            |      | 200  | 0.36 ± 0.04 | 0.01 ± 0.00 | 1.57 ± 0.16  | 0.01 ± 0.00 | 0.07 ± 0.01 | 0.00 ± 0.00 | 3.42 ± 0.40 | 2.15 ± 0.24 |
|    |        |         |            |      | 131  | 0.21 ± 0.02 | bdl         | 0.40 ± 0.04  | bdl         | 0.01 ± 0.00 | 0.01 ± 0.00 | 15.3 ± 1.7  | 8.65 ± 0.98 |
|    |        |         |            |      | 99   | 0.12 ± 0.01 | bdl         | 0.31 ± 0.04  | bdl         | 0.00 ± 0.00 | 0.00 ± 0.00 | 6.42 ± 0.70 | 3.41 ± 0.37 |
|    |        |         |            |      | 70   | 0.09 ± 0.01 | bdl         | 0.41 ± 0.05  | bdl         | 0.03 ± 0.00 | bdl         | 0.22 ± 0.03 | bdl         |
|    |        |         |            |      | 50   | 0.16 ± 0.02 | 0.01 ± 0.00 | 0.99 ± 0.11  | bdl         | 0.03 ± 0.00 | 0.02 ± 0.00 | 36.6 ± 3.9  | 23.7 ± 2.6  |
|    |        |         |            |      | 35   | 0.23 ± 0.02 | 0.02 ± 0.00 | 1.44 ± 0.15  | bdl         | 0.04 ± 0.01 | 0.04 ± 0.01 | 50.7 ± 5.4  | 37.8 ± 4.0  |
|    |        |         |            |      | 20   | 0.35 ± 0.04 | 0.03 ± 0.01 | 1.47 ± 0.16  | 0.01 ± 0.00 | 0.06 ± 0.01 | 0.05 ± 0.01 | 55.2 ± 6.8  | 39.1 ± 4.2  |
| 29 | 53.020 | -24.752 | 05/06/2014 | 3556 | 3584 | 10.3 ± 1.1  | 0.02 ± 0.01 | 42.5 ± 4.7   | 0.07 ± 0.02 | 1.31 ± 0.15 | 0.00 ± 0.00 | 3.01 ± 0.36 | 0.17 ± 0.02 |
|    |        |         |            |      | 3000 | 2.03 ± 0.23 | 0.05 ± 0.01 | 4.75 ± 0.50  | 0.11 ± 0.01 | 0.20 ± 0.02 | 0.00 ± 0.00 | 1.01 ± 0.11 | 0.31 ± 0.04 |
|    |        |         |            |      | 2500 | 1.26 ± 0.13 | 0.02 ± 0.00 | 2.88 ± 0.31  | 0.05 ± 0.01 | 0.15 ± 0.02 | bdl         | 0.76 ± 0.09 | 0.24 ± 0.03 |
|    |        |         |            |      | 2000 | 1.20 ± 0.14 | 0.01 ± 0.00 | 3.47 ± 0.35  | 0.01 ± 0.00 | 0.14 ± 0.01 | bdl         | 1.04 ± 0.11 | 0.14 ± 0.02 |
|    |        |         |            |      | 1800 | 1.29 ± 0.13 | 0.01 ± 0.00 | 4.36 ± 0.48  | 0.08 ± 0.01 | 0.15 ± 0.02 | 0.00 ± 0.00 | 0.81 ± 0.09 | 0.07 ± 0.01 |
|    |        |         |            |      | 1600 | 1.49 ± 0.15 | 0.00 ± 0.00 | 4.00 ± 0.42  | bdl         | 0.16 ± 0.02 | 0.00 ± 0.00 | 1.19 ± 0.13 | 0.14 ± 0.02 |
|    |        |         |            |      | 1400 | 1.35 ± 0.15 | 0.02 ± 0.00 | 3.86 ± 0.42  | 0.00 ± 0.00 | 0.16 ± 0.02 | 0.00 ± 0.00 | 1.89 ± 0.21 | 0.29 ± 0.03 |
|    |        |         |            |      | 1200 | 1.43 ± 0.16 | 0.00 ± 0.00 | 4.95 ± 0.52  | 0.01 ± 0.00 | 0.18 ± 0.02 | bdl         | 1.34 ± 0.14 | 0.38 ± 0.04 |
|    |        |         |            |      | 1100 | 1.21 ± 0.13 | 0.00 ± 0.00 | 3.64 ± 0.37  | 0.01 ± 0.00 | 0.18 ± 0.02 | 0.00 ± 0.00 | 1.91 ± 0.22 | 0.64 ± 0.08 |
|    |        |         |            |      | 900  | 1.09 ± 0.12 | 0.01 ± 0.00 | 4.82 ± 0.52  | 0.08 ± 0.01 | 0.18 ± 0.02 | 0.00 ± 0.00 | 2.10 ± 0.24 | 0.56 ± 0.07 |
|    |        |         |            |      | 800  | 1.15 ± 0.12 | 0.01 ± 0.00 | 3.74 ± 0.39  | bdl         | 0.19 ± 0.02 | 0.00 ± 0.00 | 2.25 ± 0.24 | 0.60 ± 0.07 |
|    |        |         |            |      | 600  | 0.93 ± 0.10 | 0.00 ± 0.00 | 2.92 ± 0.30  | bdl         | 0.17 ± 0.02 | 0.00 ± 0.00 | 2.51 ± 0.26 | 0.77 ± 0.09 |
|    |        |         |            |      | 500  | 0.63 ± 0.07 | 0.02 ± 0.00 | 2.64 ± 0.30  | 0.05 ± 0.01 | 0.14 ± 0.02 | 0.01 ± 0.00 | 2.97 ± 0.35 | 0.99 ± 0.11 |
|    |        |         |            |      | 401  | 0.69 ± 0.08 | 0.00 ± 0.00 | 2.51 ± 0.27  | bdl         | 0.17 ± 0.02 | 0.00 ± 0.00 | 3.72 ± 0.41 | 1.57 ± 0.16 |
|    |        |         |            |      | 300  | 0.48 ± 0.05 | 0.02 ± 0.00 | 2.02 ± 0.21  | bdl         | 0.09 ± 0.01 | 0.00 ± 0.00 | 6.50 ± 0.68 | 4.28 ± 0.47 |
|    |        |         |            |      | 200  | 0.32 ± 0.03 | 0.01 ± 0.00 | 1.35 ± 0.14  | 0.01 ± 0.00 | 0.08 ± 0.01 | bdl         | 1.94 ± 0.22 | 0.89 ± 0.10 |
|    |        |         |            |      | 150  | 0.26 ± 0.03 | 0.03 ± 0.00 | 1.22 ± 0.13  | 0.04 ± 0.01 | 0.03 ± 0.00 | 0.00 ± 0.00 | 4.58 ± 0.50 | 2.52 ± 0.29 |
|    |        |         |            |      | 100  | 0.21 ± 0.02 | 0.02 ± 0.00 | 1.05 ± 0.11  | bdl         | 0.02 ± 0.00 | 0.01 ± 0.00 | 8.39 ± 0.93 | 6.82 ± 0.76 |
|    |        |         |            |      | 75   | 0.22 ± 0.03 | 0.03 ± 0.00 | 0.61 ± 0.08  | 0.00 ± 0.00 | 0.02 ± 0.00 | 0.01 ± 0.00 | 12.5 ± 1.3  | 8.70 ± 1.05 |
|    |        |         |            |      | 50   | 0.16 ± 0.02 | 0.02 ± 0.00 | 0.48 ± 0.05  | bdl         | 0.02 ± 0.00 | 0.01 ± 0.00 | 16.2 ± 1.7  | 13.9 ± 1.4  |
|    |        |         |            |      | 25   | 0.21 ± 0.02 | 0.02 ± 0.00 | 0.72 ± 0.08  | 0.01 ± 0.00 | 0.04 ± 0.00 | 0.02 ± 0.00 | 39.0 ± 4.2  | 20.8 ± 2.3  |
|    |        |         |            |      | 15   | 0.34 ± 0.04 | 0.03 ± 0.00 | 0.87 ± 0.09  | 0.00 ± 0.00 | 0.04 ± 0.00 | 0.02 ± 0.00 | 43.2 ± 5.0  | 23.1 ± 2.5  |
| 32 | 55.515 | -26.703 | 08/06/2014 | 3284 | 3271 | 40.5 ± 4.4  | 0.12 ± 0.06 | 100.9 ± 11.0 | 0.27 ± 0.13 | 2.96 ± 0.33 | 0.02 ± 0.00 | 11.7 ± 1.3  | 1.57 ± 0.18 |
|    |        |         |            |      | 3230 | 29.2 ± 3.4  | 0.19 ± 0.08 | 68.6 ± 7.7   | 0.42 ± 0.16 | 2.04 ± 0.26 | 0.01 ± 0.00 | 7.10 ± 0.79 | 1.18 ± 0.13 |
|    |        |         |            |      | 3000 | 6.10 ± 0.73 | 0.03 ± 0.01 | 12.4 ± 1.3   | 0.14 ± 0.03 | 0.48 ± 0.05 | 0.00 ± 0.00 | 2.32 ± 0.27 | 0.62 ± 0.08 |
|    |        |         |            |      | 2500 | 1.16 ± 0.14 | 0.00 ± 0.00 | 2.77 ± 0.28  | 0.03 ± 0.00 | 0.14 ± 0.01 | 0.00 ± 0.00 | 0.87 ± 0.11 | 0.21 ± 0.02 |
|    |        |         |            |      | 2000 | 1.51 ± 0.17 | 0.02 ± 0.00 | 3.73 ± 0.39  | 0.16 ± 0.02 | 0.16 ± 0.02 | 0.00 ± 0.00 | 1.22 ± 0.13 | 0.22 ± 0.03 |
|    |        |         |            |      | 1750 | 1.37 ± 0.15 | 0.          |              |             |             |             |             |             |

|    |        |         |            |      |             |             |             |             |             |             |             |             |             |
|----|--------|---------|------------|------|-------------|-------------|-------------|-------------|-------------|-------------|-------------|-------------|-------------|
|    |        |         |            | 401  | 0.18 ± 0.02 | 0.02 ± 0.00 | 0.80 ± 0.09 | 0.12 ± 0.01 | 0.04 ± 0.01 | 0.00 ± 0.00 | 0.90 ± 0.10 | 0.91 ± 0.10 |             |
|    |        |         |            | 300  |             | 0.01 ± 0.00 |             | 0.01 ± 0.00 |             | 0.00 ± 0.00 |             | 2.21 ± 0.25 |             |
|    |        |         |            | 200  | 0.18 ± 0.02 | 0.01 ± 0.00 | 0.83 ± 0.10 | 0.01 ± 0.00 | 0.01 ± 0.00 | 0.00 ± 0.00 | 3.56 ± 0.42 | 2.49 ± 0.28 |             |
|    |        |         |            | 100  | 0.24 ± 0.03 | 0.02 ± 0.00 | 1.07 ± 0.11 | 0.00 ± 0.00 | 0.02 ± 0.00 | 0.01 ± 0.00 | 14.8 ± 1.6  | 10.9 ± 1.1  |             |
|    |        |         |            | 60   | 0.15 ± 0.02 | 0.05 ± 0.01 | 0.48 ± 0.05 | 0.13 ± 0.01 | 0.02 ± 0.00 | 0.02 ± 0.00 | 19.1 ± 2.2  | 17.2 ± 1.8  |             |
|    |        |         |            | 50   | 0.02 ± 0.00 | bdl         | 0.45 ± 0.05 | bdl         | 0.01 ± 0.00 | 0.02 ± 0.00 | 21.0 ± 2.2  | 13.5 ± 1.5  |             |
|    |        |         |            | 40   | bdl         |             | bdl         |             | bdl         |             | 13.5 ± 1.6  |             |             |
|    |        |         |            | 30   | 0.23 ± 0.03 | 0.08 ± 0.01 | 0.77 ± 0.08 | 0.06 ± 0.01 | 0.05 ± 0.01 | 0.05 ± 0.01 | 67.2 ± 7.3  | 62.0 ± 6.7  |             |
|    |        |         |            | 15   | 0.22 ± 0.02 | 0.02 ± 0.00 | 0.38 ± 0.05 | bdl         | 0.02 ± 0.00 | 0.02 ± 0.00 | 32.1 ± 3.4  | 20.0 ± 2.2  |             |
| 34 | 57.004 | -27.879 | 09/06/2014 | 2751 | 2777        | 13.6 ± 1.4  | 0.02 ± 0.01 | 29.1 ± 3.2  | 0.01 ± 0.00 | 1.10 ± 0.12 | 0.00 ± 0.00 | 2.51 ± 0.26 | 0.58 ± 0.06 |
|    |        |         |            |      | 2600        | 7.48 ± 0.78 | 0.01 ± 0.00 | 16.2 ± 1.7  | bdl         | 0.66 ± 0.07 | bdl         | 1.82 ± 0.19 | 0.57 ± 0.06 |
|    |        |         |            |      | 2600        | 5.44 ± 0.58 | 0.02 ± 0.01 | 11.4 ± 1.2  | bdl         | 0.46 ± 0.05 | bdl         | 0.06 ± 0.01 | bdl         |
|    |        |         |            |      | 2400        | 2.70 ± 0.30 | 0.01 ± 0.00 | 5.02 ± 0.52 | bdl         | 0.21 ± 0.02 | bdl         | 1.21 ± 0.14 | 0.49 ± 0.06 |
|    |        |         |            |      | 2100        | 1.41 ± 0.15 | bdl         | 3.25 ± 0.34 | bdl         | 0.16 ± 0.02 | bdl         | 1.18 ± 0.13 | 0.06 ± 0.01 |
|    |        |         |            |      | 1800        | 1.07 ± 0.11 | 0.01 ± 0.00 | 2.49 ± 0.26 | 0.04 ± 0.00 | 0.14 ± 0.02 | bdl         | 1.17 ± 0.13 | 0.36 ± 0.04 |
|    |        |         |            |      | 1600        | 1.12 ± 0.13 | bdl         | 2.78 ± 0.28 | bdl         | 0.17 ± 0.02 | bdl         | 1.64 ± 0.17 | 0.62 ± 0.07 |
|    |        |         |            |      | 1400        | 0.85 ± 0.09 | bdl         | 2.20 ± 0.23 | bdl         | 0.15 ± 0.02 | bdl         | 1.88 ± 0.22 | 0.53 ± 0.07 |
|    |        |         |            |      | 1200        | 0.68 ± 0.08 | bdl         | 1.79 ± 0.20 | bdl         | 0.14 ± 0.02 | bdl         | 1.35 ± 0.15 | 0.54 ± 0.06 |
|    |        |         |            |      | 1000        | 0.65 ± 0.07 | 0.00 ± 0.00 | 1.72 ± 0.18 | bdl         | 0.14 ± 0.02 | bdl         | 2.17 ± 0.24 | 0.70 ± 0.08 |
|    |        |         |            |      | 850         | 0.81 ± 0.09 | 0.01 ± 0.00 | 2.00 ± 0.21 | 0.00 ± 0.00 | 0.13 ± 0.01 | bdl         | 2.51 ± 0.27 | 0.76 ± 0.08 |
|    |        |         |            |      | 700         | 0.64 ± 0.07 | 0.02 ± 0.00 | 2.52 ± 0.26 | bdl         | 0.13 ± 0.01 | bdl         | 3.06 ± 0.33 | 1.16 ± 0.12 |
|    |        |         |            |      | 600         | 0.75 ± 0.08 |             | 2.44 ± 0.25 |             | 0.12 ± 0.01 |             | 2.68 ± 0.28 |             |
|    |        |         |            |      | 450         | 0.84 ± 0.09 | 0.00 ± 0.00 | 2.73 ± 0.27 | 0.01 ± 0.00 | 0.13 ± 0.02 | 0.00 ± 0.00 | 4.93 ± 0.54 | 1.86 ± 0.21 |
|    |        |         |            |      | 380         | 0.64 ± 0.07 | 0.00 ± 0.00 | 2.34 ± 0.26 | bdl         | 0.12 ± 0.01 | bdl         | 4.49 ± 0.48 | 1.89 ± 0.20 |
|    |        |         |            |      | 300         | 0.42 ± 0.05 | 0.01 ± 0.00 | 1.68 ± 0.20 | bdl         | 0.05 ± 0.01 | bdl         | 4.91 ± 0.56 | 3.13 ± 0.33 |
|    |        |         |            |      | 200         | 0.41 ± 0.04 | 0.02 ± 0.00 | 1.69 ± 0.18 | bdl         | 0.04 ± 0.00 | bdl         | 4.61 ± 0.51 | 4.32 ± 0.48 |
|    |        |         |            |      | 100         | 0.22 ± 0.03 | 0.01 ± 0.00 | 0.94 ± 0.10 | bdl         | 0.02 ± 0.00 | 0.00 ± 0.00 | 6.86 ± 0.73 | 4.19 ± 0.44 |
|    |        |         |            |      | 60          | 0.17 ± 0.02 | 0.01 ± 0.00 | 0.47 ± 0.05 | 0.00 ± 0.00 | 0.01 ± 0.00 | 0.01 ± 0.00 | 12.0 ± 1.2  | 10.1 ± 1.1  |
|    |        |         |            |      | 45          | 0.18 ± 0.02 | 0.01 ± 0.00 | 0.48 ± 0.05 | bdl         | 0.02 ± 0.00 | 0.01 ± 0.00 | 18.6 ± 2.0  | 11.5 ± 1.3  |
|    |        |         |            |      | 28          | 0.21 ± 0.02 | 0.02 ± 0.00 | 0.51 ± 0.05 | bdl         | 0.04 ± 0.00 | 0.02 ± 0.00 | 39.0 ± 4.1  | 30.3 ± 3.2  |
|    |        |         |            |      | 10          | 0.14 ± 0.02 | 0.01 ± 0.00 | 0.48 ± 0.05 | bdl         | 0.05 ± 0.00 | 0.02 ± 0.00 | 43.3 ± 4.8  | 21.5 ± 2.3  |
| 36 | 58.207 | -29.725 | 10/06/2014 | 2224 | 2245        | 27.4 ± 3.1  | 0.06 ± 0.03 | 56.2 ± 6.4  | 0.11 ± 0.04 | 1.11 ± 0.12 | 0.00 ± 0.00 | 4.19 ± 0.51 | 0.26 ± 0.03 |
|    |        |         |            |      | 1800        | 4.56 ± 0.49 | 0.01 ± 0.00 | 8.88 ± 0.95 | 0.00 ± 0.00 | 0.24 ± 0.03 | bdl         | 1.14 ± 0.13 | 0.05 ± 0.01 |
|    |        |         |            |      | 1500        | 2.11 ± 0.23 | 0.00 ± 0.00 | 3.76 ± 0.40 | bdl         | 0.13 ± 0.01 | bdl         | 0.71 ± 0.08 | 0.05 ± 0.00 |
|    |        |         |            |      | 1220        | 0.91 ± 0.10 | 0.01 ± 0.00 | 1.96 ± 0.20 | 0.00 ± 0.00 | 0.14 ± 0.02 | 0.00 ± 0.00 | 0.83 ± 0.10 | 0.28 ± 0.03 |
|    |        |         |            |      | 850         | 0.83 ± 0.09 | 0.00 ± 0.00 | 1.74 ± 0.18 | bdl         | 0.11 ± 0.01 | bdl         | 1.43 ± 0.16 | 0.40 ± 0.04 |
|    |        |         |            |      | 500         | 1.99 ± 0.20 | 0.00 ± 0.00 | 4.18 ± 0.46 | bdl         | 0.22 ± 0.03 | bdl         | 4.55 ± 0.51 | 0.53 ± 0.05 |
|    |        |         |            |      | 250         | 0.67 ± 0.07 | bdl         | 1.87 ± 0.20 | bdl         | 0.03 ± 0.00 | bdl         | 4.34 ± 0.52 | 0.16 ± 0.11 |
|    |        |         |            |      | 125         | bdl         | 0.01 ± 0.00 | 0.15 ± 0.27 | bdl         | bdl         | 0.00 ± 0.00 | 0.02 ± 0.03 | 3.38 ± 0.36 |
|    |        |         |            |      | 70          | 0.31 ± 0.04 | 0.01 ± 0.00 | 1.20 ± 0.13 | bdl         | 0.02 ± 0.00 | 0.01 ± 0.00 | 16.9 ± 1.8  | 7.86 ± 0.83 |
|    |        |         |            |      | 40          | 0.21 ± 0.02 | 0.02 ± 0.00 | 0.49 ± 0.05 | bdl         | 0.05 ± 0.01 | 0.01 ± 0.00 | 43.9 ± 4.8  | 14.0 ± 1.4  |
|    |        |         |            |      | 20          | 0.20 ± 0.02 | 0.02 ± 0.00 | 0.44 ± 0.06 | 0.00 ± 0.00 | 0.03 ± 0.00 | 0.02 ± 0.00 | 35.2 ± 3.7  | 27.7 ± 3.1  |
| 38 | 58.843 | -31.266 | 10/06/2014 | 1365 | 1354        | 16.2 ± 2.1  | 0.04 ± 0.01 | 28.7 ± 3.7  | 0.05 ± 0.01 | 0.50 ± 0.05 | 0.00 ± 0.00 | 2.88 ± 0.36 | 0.81 ± 0.11 |
|    |        |         |            |      | 1300        | 17.5 ± 1.9  | 0.05 ± 0.01 | 29.1 ± 3.2  | 0.07 ± 0.01 | 0.55 ± 0.06 | 0.00 ± 0.00 | 3.09 ± 0.37 | 1.17 ± 0.12 |
|    |        |         |            |      | 1163        | 14.7 ± 1.7  | 0.02 ± 0.00 | 25.2 ± 2.8  | 0.04 ± 0.01 | 0.46 ± 0.06 | 0.00 ± 0.00 | 3.53 ± 0.41 | 0.79 ± 0.09 |
|    |        |         |            |      | 1000        | 6.57 ± 0.67 | 0.05 ± 0.00 | 11.1 ± 1.2  | 0.06 ± 0.01 | 0.26 ± 0.03 | 0.00 ± 0.00 | 2.03 ± 0.23 | 0.44 ± 0.05 |
|    |        |         |            |      | 950         | 4.00 ± 0.47 | 0.02 ± 0.01 | 6.68 ± 0.74 | 0.03 ± 0.02 | 0.17 ± 0.02 | 0.00 ± 0.00 | 1.48 ± 0.16 | 0.42 ± 0.28 |
|    |        |         |            |      | 800         | 1.86 ± 0.78 | 0.03 ± 0.01 | 3.41 ± 1.04 | 0.41 ± 0.18 | 0.09 ± 0.04 | 0.00 ± 0.00 | 1.35 ± 0.42 | 0.72 ± 0.29 |
|    |        |         |            |      | 650         | bdl         | 0.14 ± 0.08 | 0.50 ± 0.45 | 0.20 ± 0.08 | bdl         | 0.00 ± 0.00 | 1.14 ± 0.29 | 2.18 ± 0.85 |
|    |        |         |            |      | 575         | 1.94 ± 0.23 | 0.08 ± 0.01 | 3.83 ± 0.44 | 0.16 ± 0.02 | 0.11 ± 0.01 | 0.00 ± 0.00 | 2.04 ± 0.24 | 1.57 ± 0.17 |
|    |        |         |            |      | 500         | 1.52 ± 0.17 | 0.07 ± 0.02 | 2.90 ± 0.41 | 0.13 ± 0.04 | 0.08 ± 0.01 | 0.00 ± 0.00 | 2.35 ± 0.31 | 1.50 ± 0.17 |
|    |        |         |            |      | 400         | 0.83 ± 0.12 | 0.03 ± 0.01 | 2.05 ± 0.29 | 0.04 ± 0.01 | 0.04 ± 0.01 | 0.00 ± 0.00 | 3.66 ± 0.47 | 1.51 ± 0.18 |
|    |        |         |            |      | 300         | 1.38 ± 0.19 | 0.08 ± 0.02 | 2.96 ± 0.37 | 0.17 ± 0.04 | 0.05 ± 0.01 | 0.00 ± 0.00 | 3.89 ± 0.52 | 2.09 ± 0.30 |
|    |        |         |            |      | 200         | 1.16 ± 0.16 | 0.12 ± 0.01 | 3.18 ± 0.38 | 0.30 ± 0.01 | 0.04 ± 0.01 | 0.00 ± 0.00 | 4.09 ± 0.45 | 1.85 ± 0.27 |
|    |        |         |            |      | 100         | 0.35 ± 0.04 | 0.22 ± 0.02 | 1.72 ± 0.19 | 0.03 ± 0.00 | 0.01 ± 0.00 | 0.01 ± 0.00 | 7.12 ± 0.80 | 5.12 ± 0.54 |
|    |        |         |            |      | 70          | 0.17 ± 0.02 | 0.03 ± 0.00 | 0.79 ± 0.09 | 0.05 ± 0.01 | 0.01 ± 0.00 | 0.01 ± 0.00 | 8.09 ± 0.93 | 8.21 ± 0.94 |
|    |        |         |            |      | 60          | 0.17 ± 0.02 | 0.03 ± 0.00 | 0.57 ± 0.06 | 0.04 ± 0.01 | 0.01 ± 0.00 | 0.02 ± 0.00 | 10.7 ± 1.2  | 13.7 ± 1.5  |
|    |        |         |            |      | 50          | 0.23 ± 0.03 | 0.02 ± 0.00 | 0.55 ± 0.06 | bdl         | 0.01 ± 0.00 | 0.01 ± 0.00 | 13.8 ± 1.5  | 11.4 ± 1.3  |
| 40 | 59.102 | -33.828 | 11/06/2014 | 2320 | 2306        | 3.31 ± 0.22 | 0.01 ± 0.00 | 8.76 ± 0.32 | 0.04 ± 0.01 | 0.22 ± 0.02 | bdl         | 0.90 ± 0.00 | bdl         |
|    |        |         |            |      | 2100        | 1.99 ± 0.01 | 0.02 ± 0.01 | 3.14 ± 0.04 | bdl         | 0.15 ± 0.00 | bdl         | bdl         | bdl         |
|    |        |         |            |      | 1600        | 1.62 ± 0.16 | 0.00 ± 0.00 | 2.76 ± 0.28 | bdl         | 0.14 ± 0.01 | bdl         | 0.56 ± 0.07 | 0.03 ± 0.00 |
|    |        |         |            |      | 1299        | 0.42 ± 0.04 | 0.04 ± 0.00 | 0.71 ± 0.07 | 0.05 ± 0.01 | 0.04 ± 0.00 | 0.00 ± 0.00 | bdl         | bdl         |
|    |        |         |            |      | 1000        | 1.39 ± 0.15 | 0.01 ± 0.00 | 2.34 ± 0.24 | bdl         | 0.11 ± 0.01 | bdl         | 1.28 ± 0.13 | 0.25 ± 0.03 |
|    |        |         |            |      | 600         | 0.92 ± 0.10 | 0.01 ± 0.00 | 1.72 ± 0.18 | 0.00 ± 0.00 | 0.08 ± 0.01 | bdl         | 1.71 ± 0.17 | 0.85 ± 0.09 |
|    |        |         |            |      | 350         | 0.48 ± 0.05 |             | 1.28 ± 0.13 |             | 0.04 ± 0.00 |             | 2.92 ± 0.33 |             |
|    |        |         |            |      | 70          | 0.64 ± 0.07 | 0.04 ± 0.01 | 3.46 ± 0.37 | 0.09 ± 0.01 | 0.04 ± 0.00 | 0.02 ± 0.00 | 31.1 ± 3.4  | 21.0 ± 2.2  |
|    |        |         |            |      | 20          | 0.36 ± 0.04 | 0.05 ± 0.01 | 0.98 ± 0.10 | bdl         | 0.06 ± 0.01 | 0.05 ± 0.01 | 74.6 ± 8.1  | 67.5 ± 7.0  |
| 42 | 59.363 | -36.396 | 12/06/2014 | 3150 | 3131        | 42.6 ± 4.8  | 0.38 ± 0.07 | 91.0 ± 10.8 | 0.78 ± 0.13 | 1.80 ± 0.19 | 0.01 ± 0.00 | 3.37 ± 0.39 | 0.36 ± 0.04 |
|    |        |         |            |      | 3100        | 24.4 ± 2.9  | 0.07 ± 0.04 | 53.1 ± 5.9  | 0.13 ± 0.07 | 1.11 ± 0.12 | 0.00 ± 0.00 | 1.97 ± 0.21 | 0.22 ± 0.02 |
|    |        |         |            |      | 2900        | 2.59 ± 0.30 | 0.00 ± 0.00 | 5.72 ± 0.61 | 0.09 ± 0.01 | 0.18 ± 0.02 | bdl         | 0.88 ± 0.10 | 0.10 ± 0.01 |
|    |        |         |            |      | 2500        | 1.75 ± 0.20 | bdl         | 3.32 ± 0.34 | bdl         | 0.15 ± 0.02 | bdl         | 0.53 ± 0.05 | bdl         |
|    |        |         |            |      | 2250        | 1.86 ± 0.21 | 0.01 ± 0.00 | 3.19 ± 0.36 | bdl         | 0.15 ± 0.02 | bdl         | 0.50 ± 0.05 | 0.16 ± 0.02 |
|    |        |         |            |      | 2000        | 1.82 ± 0.21 | 0.01 ± 0.00 | 3.12 ± 0.35 | bdl         | 0.15 ± 0.02 | bdl         | 0.66 ± 0.08 | 0.07 ± 0.01 |
|    |        |         |            |      | 1800        | 1.67 ± 0.18 | 0.00 ± 0.00 | 3.05 ± 0.32 | bdl         | 0.14 ± 0.02 | bdl         | 1.68 ± 0.18 | 0.41 ± 0.04 |
|    |        |         |            |      | 1600        | 2.06 ± 0.23 | 0.01 ± 0.00 | 3.78 ± 0.42 | 0.01 ± 0.00 | 0.16 ± 0.02 | 0.00 ± 0.00 | 1.14 ± 0.12 | 0.29 ± 0.03 |
|    |        |         |            |      | 1400        | 1.53 ± 0.17 | 0.00 ± 0.00 | 2.82 ± 0.30 | bdl         | 0.13 ± 0.02 | bdl         | 0.94 ± 0.10 | 0.12 ± 0.01 |
|    |        |         |            |      | 1200        | 1.02 ± 0.11 | 0.00 ± 0.00 | 2.11 ± 0.22 | bdl         | 0.11 ± 0.01 | 0.00 ± 0.00 | 1.09 ± 0.13 | 0.53 ± 0.06 |
|    |        |         |            |      | 1050        | 1.28 ± 0.14 | 0.07 ± 0.01 | 2.93 ± 0.31 | 0.16 ± 0.02 | 0.11 ± 0.01 | 0.00 ± 0.00 | 1.09 ± 0.11 | 0.55 ± 0.06 |
|    |        |         |            |      | 900         | 1.18 ± 0.13 | 0.01 ± 0.00 | 2.54 ± 0.27 | bdl         | 0.11 ± 0.01 | 0.00 ± 0.00 | 1.45 ± 0.16 | 0.90 ± 0.10 |
|    |        |         |            |      | 700         | 1.37 ± 0.14 | 0.02 ± 0.00 | 2.98 ± 0.31 | 0.06 ± 0.01 | 0.10 ± 0.01 | 0.00 ± 0.00 | 1.94 ± 0.21 | 2.48 ± 0.29 |
|    |        |         |            |      | 500         | 1.00 ± 0.11 | 0.00 ± 0.00 | 2.20 ± 0.23 | bdl         | 0.08 ± 0.01 | bdl         | 2.22 ± 0.25 | 1.33 ± 0.15 |
|    |        |         |            |      | 401         | 0.91 ± 0.10 | 0.01 ± 0.00 | 2.04 ± 0.22 | bdl         | 0.08 ± 0.01 | bdl         | 2.66 ± 0.28 | 1.70 ± 0.19 |
|    |        |         |            |      | 300         | 0.72 ± 0.08 | 0.01 ± 0.00 | 1.86 ± 0.20 | bdl         | 0.06 ± 0.01 | bdl         | 4.94 ± 0.52 | 2.11 ± 0.23 |
|    |        |         |            |      | 200         | 0.62 ± 0.07 | 0.01 ± 0.00 | 1.71 ± 0.18 | 0.02 ± 0.00 | 0.05 ± 0.01 | 0.00 ± 0.00 | 4.73 ± 0.52 | 2.27 ± 0.24 |
|    |        |         |            |      | 100         | 0.64 ± 0.07 | 0.02 ± 0.00 | 2.03 ± 0.22 | 0.01 ± 0.00 | 0.03 ± 0.00 | 0.00 ± 0.00 | 8.33 ± 0.86 | 5.99 ± 0.63 |
|    |        |         |            |      | 70          | 0.64 ± 0.07 | 0.03 ± 0.00 | 2.37 ± 0.25 | 0.00 ± 0.00 | 0.03 ± 0.00 | 0.02 ± 0.00 | 15.3 ± 1.6  | 13.4 ± 1.4  |
|    |        |         |            |      |             |             |             |             |             |             |             |             |             |

|    |        |         |            |      |             |             |             |             |             |             |             |             |             |
|----|--------|---------|------------|------|-------------|-------------|-------------|-------------|-------------|-------------|-------------|-------------|-------------|
|    |        |         |            | 2250 | 1.83 ± 0.75 | 0.03 ± 0.00 | 3.50 ± 1.41 | 0.05 ± 0.01 | 0.15 ± 0.04 | 0.00 ± 0.00 | 1.26 ± 0.25 | 0.87 ± 0.11 |             |
|    |        |         |            | 2000 | 1.91 ± 0.22 | 0.02 ± 0.00 | 3.54 ± 0.39 | 0.07 ± 0.00 | 0.16 ± 0.02 | 0.00 ± 0.00 | 1.53 ± 0.15 | 1.02 ± 0.09 |             |
|    |        |         |            | 1800 | 1.90 ± 0.21 | 0.02 ± 0.00 | 3.47 ± 0.39 | 0.08 ± 0.01 | 0.16 ± 0.02 | 0.00 ± 0.00 | 2.07 ± 0.17 | 1.66 ± 0.20 |             |
|    |        |         |            | 1600 | 1.76 ± 0.22 | 0.01 ± 0.00 | 3.39 ± 0.38 | 0.05 ± 0.01 | 0.15 ± 0.02 | 0.00 ± 0.00 | 1.44 ± 0.23 | 0.93 ± 0.11 |             |
|    |        |         |            | 1400 | 1.52 ± 0.18 | 0.02 ± 0.00 | 3.09 ± 0.37 | 0.06 ± 0.01 | 0.14 ± 0.02 | 0.00 ± 0.00 | 1.51 ± 0.16 | 1.09 ± 0.13 |             |
|    |        |         |            | 1100 | 1.55 ± 0.17 | 0.03 ± 0.00 | 3.56 ± 0.33 | 0.09 ± 0.01 | 0.14 ± 0.02 | 0.00 ± 0.00 | 2.58 ± 0.16 | 1.59 ± 0.17 |             |
|    |        |         |            | 900  | ± 0.17      | 0.02 ± 0.00 | ± 0.38      | 0.09 ± 0.01 | ± 0.02      | 0.00 ± 0.00 | ± 0.30      | 3.41 ± 0.39 |             |
|    |        |         |            | 700  | 1.00 ± 0.11 | 0.02 ± 0.00 | 2.33 ± 0.24 | 0.08 ± 0.01 | 0.06 ± 0.01 | 0.00 ± 0.00 | 1.67 ± 0.18 | 1.06 ± 0.14 |             |
|    |        |         |            | 600  | 1.26 ± 0.14 | 0.02 ± 0.00 | 3.13 ± 0.34 | 0.08 ± 0.01 | 0.08 ± 0.01 | 0.00 ± 0.00 | 2.29 ± 0.24 | 2.33 ± 0.26 |             |
|    |        |         |            | 470  | 2.41 ± 0.30 | 0.04 ± 0.01 | 5.41 ± 0.60 | 0.04 ± 0.00 | 0.18 ± 0.02 | 0.00 ± 0.00 | 3.88 ± 0.40 | 2.12 ± 0.23 |             |
|    |        |         |            | 300  | 1.23 ± 0.14 | 0.02 ± 0.00 | 2.85 ± 0.32 | 0.04 ± 0.00 | 0.07 ± 0.01 | 0.00 ± 0.00 | 3.55 ± 0.38 | 2.53 ± 0.29 |             |
|    |        |         |            | 200  | 1.08 ± 0.12 | 0.02 ± 0.00 | 2.58 ± 0.28 | 0.05 ± 0.01 | 0.08 ± 0.01 | 0.00 ± 0.00 | 4.50 ± 0.59 | 2.41 ± 0.26 |             |
|    |        |         |            | 160  | 1.75 ± 0.19 | 0.02 ± 0.00 | 2.39 ± 0.27 | 0.05 ± 0.01 | 0.07 ± 0.01 | 0.00 ± 0.00 | 4.80 ± 0.51 | 2.99 ± 0.37 |             |
|    |        |         |            | 120  | 1.16 ± 0.13 | 0.01 ± 0.00 | 2.87 ± 0.31 | 0.02 ± 0.00 | 0.08 ± 0.01 | 0.00 ± 0.00 | 1.91 ± 0.22 | 1.18 ± 0.13 |             |
|    |        |         |            | 50   | 0.60 ± 0.08 | 0.03 ± 0.00 | 2.35 ± 0.26 | 0.01 ± 0.00 | 0.02 ± 0.00 | 0.01 ± 0.00 | 18.4 ± 2.0  | 11.1 ± 1.2  |             |
|    |        |         |            | 35   | 0.56 ± 0.06 | 0.08 ± 0.01 | 2.55 ± 0.27 | 0.01 ± 0.00 | 0.15 ± 0.02 | 0.12 ± 0.01 | 17.5 ± 1.8  | 12.2 ± 1.3  |             |
|    |        |         |            | 30   | 0.24 ± 0.03 | 0.01 ± 0.00 | 0.98 ± 0.11 | bdl         | 0.06 ± 0.01 | 0.05 ± 0.01 | 60.5 ± 6.7  | 41.3 ± 4.3  |             |
|    |        |         |            | 20   | 0.88 ± 0.11 | 0.08 ± 0.01 | 3.38 ± 0.38 | 0.06 ± 0.01 | 0.22 ± 0.03 | 0.17 ± 0.02 | 235 ± 25    | 167 ± 18    |             |
| 49 | 59.773 | -41.297 | 15/06/2014 | 2060 | 2052        | 19.5 ± 2.3  | 0.05 ± 0.01 | 41.5 ± 4.6  | 0.08 ± 0.02 | 0.72 ± 0.08 | 0.00 ± 0.00 | 2.29 ± 0.24 | 0.25 ± 0.03 |
|    |        |         |            |      | 2000        | 19.7 ± 2.3  | 0.04 ± 0.00 | 42.5 ± 4.4  | 0.05 ± 0.01 | 0.73 ± 0.08 | 0.00 ± 0.00 | 2.13 ± 0.23 | 0.42 ± 0.04 |
|    |        |         |            |      | 1900        | 9.69 ± 1.12 | 0.02 ± 0.00 | 20.7 ± 2.1  | 0.02 ± 0.00 | 0.43 ± 0.04 | bdl         | 1.46 ± 0.15 | 0.21 ± 0.02 |
|    |        |         |            |      | 1800        | 7.37 ± 0.77 | 0.01 ± 0.00 | 15.4 ± 1.6  | bdl         | 0.34 ± 0.03 | bdl         | 1.36 ± 0.14 | 0.19 ± 0.02 |
|    |        |         |            |      | 1650        | 8.51 ± 0.88 | 0.05 ± 0.01 | 17.5 ± 1.9  | 0.41 ± 0.05 | 0.36 ± 0.04 | 0.00 ± 0.00 | 1.43 ± 0.16 | 0.26 ± 0.03 |
|    |        |         |            |      | 1500        | 7.50 ± 0.82 | 0.01 ± 0.00 | 15.0 ± 1.5  | 0.01 ± 0.00 | 0.33 ± 0.03 | bdl         | 1.38 ± 0.15 | 0.20 ± 0.02 |
|    |        |         |            |      | 1250        | 6.52 ± 0.72 | 0.02 ± 0.01 | 12.8 ± 1.5  | 0.30 ± 0.04 | 0.29 ± 0.03 | bdl         | 1.65 ± 0.19 | 0.52 ± 0.07 |
|    |        |         |            |      | 1101        | 4.79 ± 0.56 | 0.01 ± 0.00 | 9.46 ± 1.04 | bdl         | 0.22 ± 0.03 | bdl         | 1.79 ± 0.20 | 0.41 ± 0.04 |
|    |        |         |            |      | 1000        | 4.68 ± 0.52 |             | 9.18 ± 0.95 |             | 0.22 ± 0.02 |             | 1.92 ± 0.22 |             |
|    |        |         |            |      | 901         | 5.14 ± 0.56 | 0.01 ± 0.00 | 10.3 ± 1.1  | bdl         | 0.23 ± 0.02 | bdl         | 1.80 ± 0.19 | 0.47 ± 0.05 |
|    |        |         |            |      | 801         | 4.11 ± 0.46 | 0.02 ± 0.00 | 8.17 ± 0.87 | 0.20 ± 0.03 | 0.20 ± 0.02 | 0.00 ± 0.00 | 1.81 ± 0.19 | 0.52 ± 0.06 |
|    |        |         |            |      | 700         | 3.54 ± 0.37 | 0.01 ± 0.00 | 6.97 ± 0.72 | 0.17 ± 0.02 | 0.19 ± 0.02 | bdl         | 1.58 ± 0.18 | 0.75 ± 0.08 |
|    |        |         |            |      | 600         | 3.22 ± 0.33 | 0.01 ± 0.00 | 6.44 ± 0.66 | 0.00 ± 0.00 | 0.16 ± 0.02 | 0.00 ± 0.00 | 2.18 ± 0.26 | 0.73 ± 0.08 |
|    |        |         |            |      | 550         | 4.29 ± 0.44 | 0.02 ± 0.01 | 8.62 ± 0.99 | 0.00 ± 0.00 | 0.19 ± 0.02 | 0.00 ± 0.00 | 3.43 ± 0.37 | 1.56 ± 0.16 |
|    |        |         |            |      | 400         | 4.48 ± 0.50 | 0.02 ± 0.00 | 9.37 ± 1.00 | 0.01 ± 0.00 | 0.18 ± 0.02 | 0.00 ± 0.00 | 2.97 ± 0.31 | 1.88 ± 0.20 |
|    |        |         |            |      | 300         | 3.83 ± 0.43 | 0.02 ± 0.00 | 8.40 ± 0.88 | 0.03 ± 0.00 | 0.13 ± 0.02 | 0.00 ± 0.00 | 4.85 ± 0.52 | 2.98 ± 0.31 |
|    |        |         |            |      | 200         | 2.94 ± 0.31 | 0.02 ± 0.00 | 7.24 ± 0.82 | 0.00 ± 0.00 | 0.11 ± 0.01 | 0.00 ± 0.00 | 6.80 ± 0.75 | 4.31 ± 0.47 |
|    |        |         |            |      | 102         | 1.11 ± 0.12 | 0.03 ± 0.00 | 4.19 ± 0.44 | bdl         | 0.04 ± 0.00 | 0.01 ± 0.00 | 19.8 ± 2.1  | 15.3 ± 1.8  |
|    |        |         |            |      | 80          | 0.94 ± 0.10 | 0.04 ± 0.01 | 3.62 ± 0.42 | 0.01 ± 0.00 | 0.04 ± 0.01 | 0.02 ± 0.00 | 22.1 ± 2.5  | 20.8 ± 2.3  |
|    |        |         |            |      | 61          | 0.49 ± 0.05 | 0.02 ± 0.00 | 2.43 ± 0.25 | bdl         | 0.07 ± 0.01 | 0.04 ± 0.00 | 49.8 ± 5.3  | 30.4 ± 3.3  |
|    |        |         |            |      | 40          | 0.36 ± 0.35 | 0.04 ± 0.01 | 2.20 ± 1.25 | bdl         | 0.08 ± 0.01 | 0.04 ± 0.01 | 70.1 ± 4.4  | 41.6 ± 4.6  |
|    |        |         |            |      | 20          | 0.41 ± 0.04 | 0.04 ± 0.00 | 2.32 ± 0.25 | bdl         | 0.09 ± 0.01 | 0.05 ± 0.01 | 117 ± 12    | 49.8 ± 5.5  |
| 53 | 59.899 | -43.003 | 17/06/2014 | 180  | 165         | 21.5 ± 2.4  | 0.05 ± 0.01 | 72.9 ± 8.5  | 0.29 ± 0.03 | 0.62 ± 0.06 | 0.01 ± 0.00 | 5.47 ± 0.60 | 3.99 ± 0.44 |
|    |        |         |            |      | 130         | 16.5 ± 1.9  | 0.04 ± 0.00 | 55.9 ± 6.2  | 0.16 ± 0.02 | 0.51 ± 0.06 | 0.00 ± 0.00 | 4.33 ± 0.46 | 2.52 ± 0.26 |
|    |        |         |            |      | 100         | 22.1 ± 2.6  | 0.02 ± 0.00 | 70.8 ± 8.0  | 0.02 ± 0.00 | 0.77 ± 0.08 | 0.01 ± 0.00 | 8.75 ± 0.94 | 3.76 ± 0.41 |
|    |        |         |            |      | 70          | 10.7 ± 1.4  | 0.02 ± 0.00 | 31.9 ± 4.2  | 0.03 ± 0.00 | 0.42 ± 0.04 | 0.02 ± 0.00 | 10.1 ± 1.1  | 7.74 ± 0.80 |
|    |        |         |            |      | 50          | 9.42 ± 1.08 | 0.08 ± 0.01 | 32.2 ± 4.0  | 0.06 ± 0.01 | 0.36 ± 0.04 | 0.08 ± 0.01 | 38.5 ± 4.2  | 28.3 ± 2.9  |
|    |        |         |            |      | 30          | 19.0 ± 2.2  | 0.14 ± 0.02 | 61.3 ± 7.1  | 0.15 ± 0.02 | 0.46 ± 0.05 | 0.13 ± 0.02 | 96.9 ± 10.1 | 63.9 ± 6.7  |
| 56 | 59.823 | -42.399 | 18/06/2014 | 308  | 298         | 6.33 ± 0.03 | 0.26 ± 0.50 | 21.1 ± 0.1  | 0.85 ± 1.56 | 0.15 ± 0.00 | 0.01 ± 0.01 | 12.0 ± 0.6  | 5.77 ± 1.95 |
|    |        |         |            |      | 248         | 4.28 ± 0.01 | 0.09 ± 0.47 | 14.3 ± 0.0  | 0.25 ± 1.66 | 0.12 ± 0.00 | 0.01 ± 0.02 | 18.2 ± 1.1  | 9.26 ± 3.29 |
|    |        |         |            |      | 170         | 4.18 ± 0.01 | 0.06 ± 0.26 | 15.1 ± 0.0  | bdl         | 0.13 ± 0.00 | 0.02 ± 0.01 | 31.0 ± 1.7  | 16.4 ± 3.3  |
|    |        |         |            |      | 120         | 2.59 ± 0.04 | 0.04 ± 0.47 | 8.96 ± 0.25 | 0.00 ± 1.05 | 0.08 ± 0.01 | 0.02 ± 0.02 | 30.5 ± 7.6  | 20.0 ± 1.2  |
|    |        |         |            |      | 60          | 3.42 ± 0.36 | 0.04 ± 0.01 | 11.5 ± 1.2  | bdl         | 0.09 ± 0.01 | 0.01 ± 0.00 | 25.0 ± 2.6  | 12.5 ± 1.5  |
|    |        |         |            |      | 40          | 5.49 ± 0.60 | 0.19 ± 0.02 | 17.9 ± 2.0  | 0.32 ± 0.03 | 0.14 ± 0.02 | 0.02 ± 0.00 | 30.7 ± 3.4  | 11.7 ± 1.3  |
|    |        |         |            |      | 20          | 8.15 ± 0.85 | 0.06 ± 0.01 | 27.2 ± 2.9  | 0.12 ± 0.02 | 0.21 ± 0.02 | 0.01 ± 0.00 | 22.3 ± 2.4  | 11.8 ± 1.3  |
| 60 | 59.799 | -42.003 | 17/06/2014 | 1752 | 1737        | 14.3 ± 1.5  | 0.14 ± 0.02 | 30.4 ± 3.4  | 0.36 ± 0.04 | 0.51 ± 0.05 | 0.01 ± 0.00 | 2.91 ± 0.37 | 1.37 ± 0.15 |
|    |        |         |            |      | 1647        | 14.2 ± 2.1  | 0.05 ± 0.01 | 30.4 ± 3.6  | bdl         | 0.34 ± 0.05 | bdl         | 2.44 ± 0.29 | 1.48 ± 0.18 |
|    |        |         |            |      | 1500        | 17.9 ± 1.9  | 0.02 ± 0.00 | 38.4 ± 4.0  | bdl         | 0.41 ± 0.05 | bdl         | 3.22 ± 0.37 | 1.24 ± 0.14 |
|    |        |         |            |      | 1300        | 7.08 ± 0.76 | 0.01 ± 0.00 | 13.5 ± 1.4  | bdl         | 0.22 ± 0.02 | bdl         | 2.57 ± 0.30 | 1.37 ± 0.15 |
|    |        |         |            |      | 1150        | 5.76 ± 0.66 | 0.04 ± 0.01 | 10.5 ± 1.2  | bdl         | 0.17 ± 0.02 | bdl         | 2.16 ± 0.23 | 1.38 ± 0.25 |
|    |        |         |            |      | 950         | 1.43 ± 0.16 | 0.24 ± 0.03 | 1.90 ± 0.21 | bdl         | bdl         | 0.01 ± 0.00 | 1.57 ± 0.18 | 1.23 ± 0.14 |
|    |        |         |            |      | 850         | 2.84 ± 0.31 | bdl         | 4.88 ± 0.50 | bdl         | 0.08 ± 0.01 | bdl         | 3.16 ± 0.33 | 1.11 ± 0.12 |
|    |        |         |            |      | 750         | 1.60 ± 0.16 | 0.02 ± 0.00 | 2.74 ± 0.28 | bdl         | 0.03 ± 0.00 | bdl         | 2.56 ± 0.28 | 1.46 ± 0.40 |
|    |        |         |            |      | 650         | 2.19 ± 0.24 | 0.01 ± 0.00 | 3.72 ± 0.38 | bdl         | 0.06 ± 0.01 | bdl         | 2.75 ± 0.29 | 1.74 ± 0.18 |
|    |        |         |            |      | 550         | 1.33 ± 0.14 | 0.02 ± 0.00 | 2.16 ± 0.22 | bdl         | bdl         | bdl         | 1.60 ± 0.17 | 1.98 ± 0.23 |
|    |        |         |            |      | 450         | 1.83 ± 0.20 | 0.01 ± 0.00 | 3.07 ± 0.36 | bdl         | 0.02 ± 0.00 | bdl         | 2.91 ± 0.30 | 2.15 ± 0.24 |
|    |        |         |            |      | 350         | 3.02 ± 0.31 | 0.05 ± 0.01 | 5.60 ± 0.59 | bdl         | 0.03 ± 0.00 | bdl         | 4.36 ± 0.51 | 2.80 ± 0.30 |
|    |        |         |            |      | 300         | 2.11 ± 0.22 | 0.01 ± 0.00 | 4.11 ± 0.42 | bdl         | bdl         | bdl         | 4.95 ± 0.52 | 3.73 ± 0.40 |
|    |        |         |            |      | 250         | 1.90 ± 0.21 | 0.00 ± 0.00 | 3.61 ± 0.37 | bdl         | bdl         | bdl         | 6.64 ± 0.73 | 0.53 ± 0.06 |
|    |        |         |            |      | 200         | ± 0.38      | 0.02 ± 0.00 | 6.40        | bdl         | 0.05        | bdl         | ± 0.79      | 8.42 ± 0.95 |
|    |        |         |            |      | 150         | 1.77 ± 0.20 | 0.02 ± 0.00 | 4.54 ± 0.47 | bdl         | 0.06 ± 0.01 | 0.00 ± 0.00 | 8.16 ± 0.89 | 5.65 ± 0.57 |
|    |        |         |            |      | 100         | 1.08 ± 0.12 | 0.02 ± 0.00 | 3.49 ± 0.35 | bdl         | 0.03 ± 0.00 | 0.01 ± 0.00 | 11.7 ± 1.3  | 10.3 ± 1.1  |
|    |        |         |            |      | 80          | 1.04 ± 0.12 | 0.03 ± 0.00 | 2.84 ± 0.31 | bdl         | bdl         | 0.00 ± 0.00 | 17.4 ± 1.9  | 14.7 ± 1.5  |
|    |        |         |            |      | 60          | 0.90 ± 0.10 | 0.03 ± 0.00 | 2.64 ± 0.29 | bdl         | bdl         | bdl         | 21.7 ± 2.4  | 13.2 ± 1.4  |
|    |        |         |            |      | 40          | 0.46 ± 0.05 | 0.04 ± 0.01 | 1.15 ± 0.12 | bdl         | bdl         | 0.02 ± 0.00 | 30.4 ± 3.2  | 24.1 ± 2.6  |
|    |        |         |            |      | 30          | bdl         | bdl         | bdl         | bdl         | bdl         | bdl         | 28.9 ± 3.0  | 13.4 ± 1.5  |
|    |        |         |            |      | 20          | bdl         | bdl         | 1.44 ± 0.15 | bdl         | 0.12 ± 0.01 | 0.09 ± 0.01 | 175 ± 18    | 102 ± 11    |
| 61 | 59.753 | -45.112 | 19/06/2014 | 151  | 136         | 18.7 ± 1.9  | 0.06 ± 0.01 | 60.3 ± 6.1  | 0.09 ± 0.01 | 0.46 ± 0.05 | 0.02 ± 0.00 | 17.2 ± 1.8  | 10.8 ± 1.2  |
|    |        |         |            |      | 120         | 14.5 ± 1.6  | 0.34 ± 0.04 | 46.2 ± 4.7  | 0.05 ± 0.03 | 0.56 ± 0.06 | 0.02 ± 0.00 | 17.5 ± 1.8  | 6.50 ± 0.68 |
|    |        |         |            |      | 100         | 9.59 ± 0.98 | 0.03 ± 0.01 | 29.0 ± 3.1  | 0.08 ± 0.03 | 0.41 ± 0.04 | 0.02 ± 0.00 | 13.7 ± 1.5  | 6.61 ± 0.68 |
|    |        |         |            |      | 70          | 11.0 ± 1.2  | 0.00 ± 0.00 | 37.2 ± 3.8  | bdl         | 0.39 ± 0.04 | 0.05 ± 0.01 | 96.1 ± 9.9  | 32.3 ± 3.4  |
|    |        |         |            |      | 50          | 15.6 ± 1.8  | 0.04 ± 0.00 | 52.2 ± 5.9  | bdl         | 0.41 ± 0.04 | 0.10 ± 0.01 | 88.1 ± 9.1  | 55.7 ± 5.8  |
|    |        |         |            |      | 25          | 14.1 ± 1.5  | 0.07 ± 0.01 | 47.1 ± 4.9  | bdl         | 0.39 ± 0.04 | 0.12 ± 0.01 | 125 ± 13    | 72.1 ± 7.7  |
| 63 | 59.434 | -45.666 | 19/06/2014 | 1563 | 1558        | 9.09 ± 0.01 | 0.01 ± 0.00 | 20.8 ± 0.0  | 0.03 ± 0.00 | 0.38 ± 0.00 | bdl         | 1.66 ± 1.99 | 0.21 ± 0.02 |
|    |        |         |            |      | 1300        | 6.84 ± 0.75 | 0.01 ± 0.00 | 14.7 ± 1.5  | 0.01 ± 0.00 | 0.29 ± 0.03 | bdl         | 1.86 ± 0.21 | 0.47 ± 0.05 |
|    |        |         |            |      | 1096        | 5.81 ± 0.69 | 0.01 ± 0.00 | 12.2 ± 1.4  | bdl         | 0.26 ± 0.03 | 0.00 ± 0.00 | 2.12 ± 0.23 | 0.62 ± 0.07 |
|    |        |         |            |      | 850         | 4.60 ± 0.53 | 0.02 ± 0.00 | 9.65 ± 1.11 | 0.05 ± 0.01 | 0.21 ± 0.02 | 0.00 ± 0.00 | 2.30 ± 0.25 | 0.99 ± 0.11 |

|      |             |             |             |             |      |             |             |              |             |             |             |             |             |             |             |             |             |             |
|------|-------------|-------------|-------------|-------------|------|-------------|-------------|--------------|-------------|-------------|-------------|-------------|-------------|-------------|-------------|-------------|-------------|-------------|
| 64   | 59.068      | -46.083     | 20/06/2014  | 2517        | 2502 | 14.2 ± 1.6  | 0.02 ± 0.00 | 31.3 ± 3.3   | 0.02 ± 0.00 | 0.59 ± 0.08 | 0.00 ± 0.00 | 1.86 ± 0.19 | 0.41 ± 0.05 |             |             |             |             |             |
|      |             |             |             |             | 2401 | 9.35 ± 0.99 | 0.03 ± 0.00 | 19.7 ± 2.1   | 0.06 ± 0.01 | 0.43 ± 0.05 | 0.00 ± 0.00 | 1.47 ± 0.16 | 0.29 ± 0.03 |             |             |             |             |             |
|      |             |             |             |             | 2151 | 1.37 ± 0.15 | 0.01 ± 0.00 | 3.03 ± 0.32  |             | 0.11 ± 0.01 | bdl         | 0.60 ± 0.07 | bdl         |             |             |             |             |             |
|      |             |             |             |             | 2001 | 3.68 ± 0.37 | 0.03 ± 0.00 | 7.79 ± 0.83  | 0.05 ± 0.01 | 0.19 ± 0.02 | 0.00 ± 0.00 | 0.84 ± 0.09 |             |             |             |             |             |             |
|      |             |             |             |             | 1800 | 3.22 ± 0.34 | 0.00 ± 0.00 | 7.07 ± 0.73  |             | 0.18 ± 0.02 | 0.00 ± 0.00 | 0.82 ± 0.09 |             |             |             |             |             |             |
|      |             |             |             |             | 1601 | 3.49 ± 0.36 | 0.00 ± 0.00 | 6.85 ± 0.72  | 0.01 ± 0.00 | 0.19 ± 0.02 | 0.00 ± 0.00 | 1.11 ± 0.12 | 0.06 ± 0.01 |             |             |             |             |             |
|      |             |             |             |             | 1400 | 2.81 ± 0.29 | 0.40 ± 0.05 | 5.64 ± 0.60  | 0.81 ± 0.09 | 0.17 ± 0.02 | 0.02 ± 0.00 | 1.14 ± 0.12 | 0.96 ± 0.11 |             |             |             |             |             |
|      |             |             |             |             | 1150 | 2.68 ± 0.29 | 0.03 ± 0.00 | 5.80 ± 0.60  | 0.06 ± 0.01 | 0.16 ± 0.02 | 0.00 ± 0.00 | 1.49 ± 0.16 | 0.50 ± 0.05 |             |             |             |             |             |
|      |             |             |             |             | 1050 | 0.49 ± 0.05 | 0.77 ± 0.08 | 1.08 ± 0.11  | 1.59 ± 0.16 | 0.03 ± 0.00 | 0.05 ± 0.01 | 0.39 ± 0.04 | 0.91 ± 0.10 |             |             |             |             |             |
|      |             |             |             |             | 900  | 1.77 ± 0.19 | 0.01 ± 0.00 | 4.04 ± 0.43  | 0.01 ± 0.00 | 0.11 ± 0.01 | 0.00 ± 0.00 | 2.20 ± 0.23 | 0.81 ± 0.09 |             |             |             |             |             |
|      |             |             |             |             | 800  | 2.19 ± 0.26 | 0.03 ± 0.00 | 4.47 ± 0.47  | ± 0.00      | 0.13 ± 0.01 | 0.00 ± 0.00 | 2.24 ± 0.24 | 0.87 ± 0.10 |             |             |             |             |             |
|      |             |             |             |             | 700  | 1.98 ± 0.21 | 0.01 ± 0.00 | 4.06 ± 0.45  | ± 0.00      | 0.13 ± 0.02 | 0.00 ± 0.00 | 2.20 ± 0.26 | 1.58 ± 0.19 |             |             |             |             |             |
|      |             |             |             |             | 500  | 2.36 ± 0.25 | 0.02 ± 0.01 | 4.86 ± 0.49  | 0.06 ± 0.03 | 0.11 ± 0.01 | 0.00 ± 0.00 | 3.02 ± 0.33 | 2.23 ± 0.24 |             |             |             |             |             |
|      |             |             |             |             | 400  | 4.57 ± 0.49 | 0.01 ± 0.00 | 9.50 ± 0.96  | 0.00 ± 0.00 | 0.20 ± 0.02 | 0.00 ± 0.00 | 2.22 ± 0.23 | 1.56 ± 0.17 |             |             |             |             |             |
|      |             |             |             |             | 320  | 5.62 ± 0.68 | 0.01 ± 0.00 | 12.3 ± 1.3   | 0.02 ± 0.00 | 0.22 ± 0.02 | 0.00 ± 0.00 | 3.89 ± 0.42 | 2.46 ± 0.27 |             |             |             |             |             |
|      |             |             |             |             | 200  | 3.38 ± 0.30 | 0.01 ± 0.00 | 7.83 ± 0.73  | 0.01 ± 0.00 | 0.13 ± 0.01 | 0.00 ± 0.00 | 5.25 ± 0.47 | 3.99 ± 0.43 |             |             |             |             |             |
|      |             |             |             |             | 150  | 2.56 ± 0.28 | 0.01 ± 0.00 | 6.10 ± 0.64  | ± 0.00      | 0.10 ± 0.01 | 0.00 ± 0.00 | 9.99 ± 1.01 | 4.78 ± 0.50 |             |             |             |             |             |
|      |             |             |             |             | 100  | 0.97 ± 0.10 | 0.02 ± 0.00 | 2.48 ± 0.28  | 0.01 ± 0.00 | 0.03 ± 0.00 | 0.01 ± 0.00 | 9.67 ± 1.01 | 6.09 ± 0.65 |             |             |             |             |             |
|      |             |             |             |             | 50   | 0.14 ± 0.02 | 0.02 ± 0.00 | 0.85 ± 0.09  | 0.02 ± 0.00 | 0.01 ± 0.00 | 0.01 ± 0.00 | 21.4 ± 2.3  | 10.7 ± 1.2  |             |             |             |             |             |
|      |             |             |             |             | 35   | 0.44 ± 0.05 |             | 1.66 ± 0.18  |             | 0.04 ± 0.00 |             | 58.6 ± 6.0  |             |             |             |             |             |             |
|      |             |             |             |             | 25   | bdl         | 0.01 ± 0.00 | 0.15 ± -0.02 | bdl         | bdl         | 0.01 ± 0.00 | 36.9 ± 3.1  | 22.2 ± 2.4  |             |             |             |             |             |
|      |             |             |             |             | 15   | bdl         | bdl         | bdl          | bdl         | bdl         | bdl         | 41.1 ± 4.2  | 29.5 ± 3.2  |             |             |             |             |             |
|      |             |             |             |             | 68   | 56.913      | -47.419     | 21/06/2014   | 3586        | 3638        | 68.4 ± 9.4  | 0.24 ± 0.09 | 156 ± 17    | 0.49 ± 0.18 | 2.46 ± 0.26 | 0.01 ± 0.00 | 4.61 ± 0.52 | 0.28 ± 0.03 |
|      |             |             |             |             |      |             |             |              |             | 3399        | 5.62 ± 0.77 | 0.03 ± 0.00 | 15.3 ± 1.7  | 0.07 ± 0.01 | 0.32 ± 0.04 | 0.00 ± 0.00 | 0.76 ± 0.08 | 0.03 ± 0.00 |
|      |             |             |             |             |      |             |             |              |             | 2500        | 1.85 ± 0.19 | 0.01 ± 0.00 | 4.68 ± 0.50 | 0.01 ± 0.00 | 0.14 ± 0.02 | bdl         | 0.78 ± 0.09 | 0.01 ± 0.00 |
| 1700 | 2.11 ± 0.22 | 0.00 ± 0.00 | 5.17 ± 0.53 | bdl         |      |             |             |              |             | 0.13 ± 0.01 | 0.00 ± 0.00 | 0.86 ± 0.09 | 0.29 ± 0.03 |             |             |             |             |             |
| 1400 | 1.69 ± 0.18 | 0.49 ± 0.06 | 4.52 ± 0.49 | 1.34 ± 0.14 |      |             |             |              |             | 0.10 ± 0.01 | 0.03 ± 0.00 | 1.44 ± 0.15 | 1.12 ± 0.12 |             |             |             |             |             |
| 900  | 1.20 ± 0.18 | 0.01 ± 0.00 | 3.33 ± 0.39 | bdl         |      |             |             |              |             | 0.09 ± 0.01 | 0.00 ± 0.00 | 2.13 ± 0.22 | 1.97 ± 0.23 |             |             |             |             |             |
| 350  | 2.02 ± 0.25 | 0.02 ± 0.00 | 5.31 ± 0.55 | bdl         |      |             |             |              |             | 0.10 ± 0.01 | 0.00 ± 0.00 | 3.49 ± 0.40 | 3.10 ± 0.35 |             |             |             |             |             |
| 101  | 1.79 ± 0.25 | 0.03 ± 0.00 | 5.84 ± 0.73 | bdl         |      |             |             |              |             | 0.09 ± 0.01 | 0.01 ± 0.00 | 9.99 ± 1.10 | 10.5 ± 1.2  |             |             |             |             |             |
| 50   | 1.00 ± 0.13 | 0.04 ± 0.01 | 4.09 ± 0.65 | bdl         |      |             |             |              |             | 0.04 ± 0.01 | 0.02 ± 0.00 | 25.5 ± 3.0  | 20.5 ± 2.5  |             |             |             |             |             |
| 35   | 0.52 ± 0.07 | 0.06 ± 0.01 | 2.25 ± 0.36 | bdl         |      |             |             |              |             | 0.01 ± 0.00 | 0.03 ± 0.01 | 25.8 ± 2.9  | 43.0 ± 5.9  |             |             |             |             |             |
| 30   | 0.79 ± 0.11 | 0.04 ± 0.02 | 4.20 ± 0.54 | bdl         |      |             |             |              |             | 0.04 ± 0.01 | 0.03 ± 0.02 | 67.0 ± 7.4  | 55.4 ± 6.9  |             |             |             |             |             |
| 20   | 0.43 ± 0.06 | 0.01 ± 0.00 | 2.15 ± 0.31 | bdl         |      |             |             |              |             | 0.03 ± 0.01 | 0.01 ± 0.00 | 63.8 ± 7.3  | 34.9 ± 4.1  |             |             |             |             |             |
| 69   | 55.841      | -48.093     | 23/06/2014  | 3741        |      |             |             |              |             | 3726        | 58.9 ± 6.3  | 0.12 ± 0.02 | 139 ± 15    | 0.28 ± 0.05 | 2.42 ± 0.26 | 0.00 ± 0.00 | 3.82 ± 0.44 | 0.52 ± 0.06 |
|      |             |             |             |             |      |             |             |              |             | 3700        | 57.8 ± 6.3  | 0.08 ± 0.02 | 138 ± 15    | 0.22 ± 0.08 | 2.38 ± 0.25 | 0.00 ± 0.00 | 3.81 ± 0.42 | 0.38 ± 0.05 |
|      |             |             |             |             |      |             |             |              |             | 3500        |             | 0.03 ± 0.01 |             | 0.05 ± 0.01 |             | 0.00 ± 0.00 |             | bdl         |
|      |             |             |             |             |      |             |             |              |             | 3249        | 2.64 ± 0.27 | 0.00 ± 0.00 | 6.07 ± 0.63 | bdl         | 0.17 ± 0.02 | 0.00 ± 0.00 | 0.67 ± 0.07 | 0.12 ± 0.01 |
|      |             |             |             |             |      |             |             |              |             | 2800        | 2.21 ± 0.24 | 0.01 ± 0.00 | 5.66 ± 0.59 | 0.04 ± 0.00 | 0.15 ± 0.02 | 0.00 ± 0.00 | 0.77 ± 0.08 | 0.28 ± 0.03 |
|      |             |             |             |             |      |             |             |              |             | 2399        | 2.18 ± 0.23 | 0.01 ± 0.00 | 5.15 ± 0.52 | bdl         | 0.15 ± 0.02 | 0.00 ± 0.00 | 1.58 ± 0.18 | 1.33 ± 0.14 |
|      |             |             |             |             |      |             |             |              |             | 2100        | 1.48 ± 0.16 | 0.00 ± 0.00 | 3.70 ± 0.38 | bdl         | 0.10 ± 0.01 | 0.00 ± 0.00 | 0.47 ± 0.06 | 0.08 ± 0.01 |
|      |             |             |             |             |      |             |             |              |             | 1800        | 1.63 ± 0.18 | bdl         | 3.99 ± 0.46 | bdl         | 0.12 ± 0.01 | 0.00 ± 0.00 | 0.77 ± 0.08 | 0.19 ± 0.02 |
|      |             |             |             |             |      |             |             |              |             | 1600        | 1.64 ± 0.17 | 0.00 ± 0.00 | 4.21 ± 0.45 | bdl         | 0.11 ± 0.01 | 0.00 ± 0.00 | 0.91 ± 0.10 | 0.32 ± 0.03 |
|      |             |             |             |             |      |             |             |              |             | 1400        | 1.69 ± 0.18 | 0.00 ± 0.00 | 4.52 ± 0.46 | bdl         | 0.11 ± 0.01 | 0.00 ± 0.00 | 1.26 ± 0.14 | 0.59 ± 0.07 |
|      |             |             |             |             |      |             |             |              |             | 1100        | 1.67 ± 0.19 | 0.00 ± 0.00 | 4.50 ± 0.48 | bdl         | 0.09 ± 0.01 | 0.00 ± 0.00 | 2.28 ± 0.24 | 0.79 ± 0.09 |
|      |             |             |             |             |      |             |             |              |             | 801         | 1.92 ± 0.00 | 0.01 ± 0.36 | 5.09 ± 0.00 | 0.02 ± 0.86 | 0.11 ± 0.00 | 0.00 ± 0.01 | 3.31 ± 0.19 | 1.73 ± 0.56 |
|      |             |             |             |             |      |             |             |              |             | 501         | 1.87 ± 0.28 | 0.02 ± 0.00 | 5.02 ± 0.74 | 0.03 ± 0.00 | 0.11 ± 0.01 | 0.00 ± 0.00 | 3.34 ± 0.40 | 1.99 ± 0.21 |
|      |             |             |             |             | 180  | 2.97 ± 0.31 | 0.02 ± 0.00 | 8.06 ± 0.82  | 0.01 ± 0.00 | 0.14 ± 0.01 | 0.00 ± 0.00 | 9.39 ± 0.98 | 5.10 ± 0.53 |             |             |             |             |             |
|      |             |             |             |             | 130  | 3.09 ± 0.32 | 0.03 ± 0.00 | 8.64 ± 0.89  | 0.02 ± 0.00 | 0.13 ± 0.01 | 0.01 ± 0.00 | 9.30 ± 0.98 | 6.22 ± 0.72 |             |             |             |             |             |
|      |             |             |             |             | 100  | 2.87 ± 0.30 | 0.03 ± 0.00 | 8.27 ± 0.85  | 0.04 ± 0.00 | 0.13 ± 0.01 | 0.01 ± 0.00 | 9.02 ± 0.92 | 9.05 ± 0.93 |             |             |             |             |             |
|      |             |             |             |             | 70   | 2.88 ± 0.31 | 0.04 ± 0.00 | 8.69 ± 0.90  | bdl         | 0.16 ± 0.02 | 0.01 ± 0.00 | 13.9 ± 1.5  | 11.7 ± 1.3  |             |             |             |             |             |
|      |             |             |             |             | 40   | 1.80 ± 0.19 | 0.05 ± 0.01 | 6.51 ± 0.67  | 0.03 ± 0.00 | 0.12 ± 0.01 | 0.00 ± 0.00 | 38.1 ± 4.4  | 19.7 ± 2.1  |             |             |             |             |             |
|      |             |             |             |             | 25   | 1.02 ± 0.13 | 0.07 ± 0.02 | 4.07 ± 0.42  | 0.03 ± 0.02 | 0.07 ± 0.01 | 0.03 ± 0.00 | 103 ± 11    | 61.5 ± 6.9  |             |             |             |             |             |
|      |             |             |             |             | 15   | 1.29 ± 0.14 | 0.08 ± 0.01 | 4.49 ± 0.49  | 0.01 ± 0.00 | 0.08 ± 0.01 | 0.04 ± 0.00 | 130 ± 14    | 83.3 ± 8.4  |             |             |             |             |             |
|      |             |             |             |             | 71   | 53.692      | -49.433     | 24/06/2014   | 3700        | 3736        | 88.9 ± 17.0 | 0.09 ± 0.04 | 264 ± 54    | 0.26 ± 0.11 | 3.49 ± 0.85 | 0.00 ± 0.00 | 7.27 ± 0.81 | 0.69 ± 0.08 |
|      |             |             |             |             |      |             |             |              |             | 3500        | 4.80 ± 0.52 | bdl         | 13.6 ± 1.8  | bdl         | 0.24 ± 0.03 | bdl         | 0.74 ± 0.08 | 0.14 ± 0.03 |
|      |             |             |             |             |      |             |             |              |             | 3000        | 1.80 ± 0.41 | 0.00 ± 0.00 | 5.01 ± 0.59 | 0.00 ± 0.00 | 0.12 ± 0.06 | bdl         | 0.46 ± 0.17 | bdl         |
|      |             |             |             |             |      |             |             |              |             | 2400        | 1.44 ± 0.28 | 0.00 ± 0.00 | 3.65 ± 0.47 | bdl         | 0.10 ± 0.05 | bdl         | 0.37 ± 0.14 | 0.36 ± 0.05 |
|      |             |             |             |             |      |             |             |              |             | 1200        | 0.99 ± 0.12 | 0.00 ± 0.00 | 2.94 ± 0.36 | bdl         | 0.09 ± 0.01 | 0.00 ± 0.00 | 1.14 ± 0.13 | 0.27 ± 0.03 |
| 800  | 0.89 ± 0.09 | 0.02 ± 0.00 | 2.75 ± 0.33 | 0.03 ± 0.00 |      |             |             |              |             | 0.08 ± 0.01 | 0.00 ± 0.00 | 1.88 ± 0.21 | 0.61 ± 0.07 |             |             |             |             |             |
| 500  | 0.97 ± 0.18 | 0.01 ± 0.00 | 3.22 ± 0.59 | 0.01 ± 0.00 |      |             |             |              |             | 0.09 ± 0.02 | 0.00 ± 0.00 | 2.43 ± 0.26 | 1.05 ± 0.11 |             |             |             |             |             |
| 250  | 0.54 ± 0.06 | 0.00 ± 0.00 | 1.76 ± 0.22 | bdl         |      |             |             |              |             | 0.05 ± 0.01 | 0.00 ± 0.00 | 3.31 ± 0.36 | 1.88 ± 0.23 |             |             |             |             |             |
| 150  | 0.54 ± 0.06 | 0.00 ± 0.00 | 1.93 ± 0.22 | bdl         |      |             |             |              |             | 0.05 ± 0.01 | 0.00 ± 0.00 | 4.69 ± 0.60 | 2.55 ± 0.32 |             |             |             |             |             |
| 100  | 0.51 ± 0.06 | 0.04 ± 0.01 | 1.82 ± 0.20 | bdl         |      |             |             |              |             | 0.03 ± 0.01 | 0.01 ± 0.00 | 6.43 ± 0.76 | 3.42 ± 0.46 |             |             |             |             |             |
| 60   | 0.24 ± 0.03 | 0.01 ± 0.00 | 1.04 ± 0.26 | bdl         |      |             |             |              |             | 0.01 ± 0.00 | 0.03 ± 0.00 | 11.8 ± 1.3  | 19.9 ± 2.1  |             |             |             |             |             |
| 50   | 0.43 ± 0.05 | 0.02 ± 0.00 | 2.58 ± 0.27 | 0.08 ± 0.01 |      |             |             |              |             | 0.05 ± 0.01 | 0.03 ± 0.01 | 43.7 ± 4.8  | 27.6 ± 3.2  |             |             |             |             |             |
| 40   | 0.06 ± 0.01 | 0.02 ± 0.00 | 0.18 ± 0.02 | 0.05 ± 0.01 |      |             |             |              |             | 0.01 ± 0.00 | 0.01 ± 0.00 | 15.3 ± 1.7  | 7.33 ± 0.84 |             |             |             |             |             |
| 30   | bdl         | bdl         | 0.14 ± 0.02 | bdl         |      |             |             |              |             | 0.07 ± 0.01 | 0.04 ± 0.01 | 77.1 ± 9.8  | 38.4 ± 4.3  |             |             |             |             |             |
| 20   | 0.27 ± 0.03 | 0.03 ± 0.00 | 0.49 ± 0.07 | 0.03 ± 0.00 |      |             |             |              |             | 0.11 ± 0.02 | 0.07 ± 0.01 | 106 ± 15    | 55.8 ± 6.5  |             |             |             |             |             |
| 77   | 53.000      | -51.100     | 26/06/2014  | 2558        |      |             |             |              |             | 2543        | 10.1 ± 1.1  | 0.02 ± 0.01 | 28.9 ± 3.3  | 0.04 ± 0.01 | 0.35 ± 0.04 | 0.00 ± 0.00 | 1.22 ± 0.14 | 0.22 ± 0.04 |
|      |             |             |             |             |      |             |             |              |             | 2450        | 9.42 ± 0.99 | 0.02 ± 0.00 | 26.7 ± 2.9  | 0.07 ± 0.01 | 0.33 ± 0.04 | 0.00 ± 0.00 | 0.93 ± 0.11 | bdl         |
|      |             |             |             |             |      |             |             |              |             | 2400        | 9.29 ± 1.04 | 0.20 ± 0.03 | 26.6 ± 2.7  | 0.50 ± 0.06 | 0.32 ± 0.03 | 0.01 ± 0.00 | 0.83 ± 0.09 | bdl         |
|      |             |             |             |             |      |             |             |              |             | 2100        | 3.61 ± 0.39 | 0.02 ± 0.00 | 8.87 ± 0.94 | 0.03 ± 0.00 | 0.17 ± 0.02 | 0.00 ± 0.00 | 0.45 ± 0.05 | bdl         |
|      |             |             |             |             |      |             |             |              |             | 1900        | 3.62 ± 0.37 | 0.01 ± 0.00 | 8.79 ± 0.93 | 0.00 ± 0.00 | 0.16 ± 0.02 | 0.00 ± 0.00 | 0.89 ± 0.10 | bdl         |
|      |             |             |             |             |      |             |             |              |             | 1700        | 2.55 ± 0.29 | 0.42 ± 0.04 | 6.72 ± 0.75 | 1.24 ± 0.13 | 0.14 ± 0.02 | 0.01 ± 0.00 | 0.77 ± 0.09 | 0.20 ± 0.02 |
|      |             |             |             |             |      |             |             |              |             | 1500        | 2.63 ± 0.28 | 0.00 ± 0.00 | 6.80 ± 0.71 | 0.00 ± 0.00 | 0.13 ± 0.01 | 0.00 ± 0.00 | 0.72 ± 0.07 | bdl         |
|      |             |             |             |             |      |             |             |              |             | 1300        | 2.64 ± 0.28 | 0.01 ± 0.00 | 7.08 ± 0.73 | bdl         | 0.14 ± 0.02 | 0.00 ± 0.00 | 0.97 ± 0.12 | 0.13 ± 0.01 |
|      |             |             |             |             |      |             |             |              |             | 1200        | 3.14 ± 0.33 | bdl         | 8.69 ± 0.90 | bdl         | 0.14 ± 0.02 | 0.00 ± 0.00 | 0.80 ± 0.08 | 0.10 ± 0.01 |
|      |             |             |             |             |      |             |             |              |             | 1100        | 2.12 ± 0.22 | 0.04 ± 0.01 | 5.90 ± 0.60 | 0.11 ± 0.01 | 0.10 ± 0.01 | 0.00 ± 0.00 | 1.39 ± 0.16 | 0.51 ± 0.06 |
|      |             |             |             |             | 1000 | 2.32 ± 0.26 | bdl         | 7.12 ± 0.81  | bdl         | 0.11 ± 0.01 | 0.00 ± 0.00 | 1.84 ± 0.19 | 0.45 ± 0.05 |             |             |             |             |             |
|      |             |             |             |             | 700  | 3.03 ± 0.19 | 0.00 ± 0.00 | 8.89 ± 0.52  | 0.01 ± 0.00 | 0.13 ± 0.01 | 0.00 ± 0.00 | 4.13 ± 0.35 | 2.21 ± 0.25 |             |             |             |             |             |
|      |             |             |             |             | 400  | 2.94 ± 0.35 | 0.03 ± 0.00 | 8.75 ± 0.97  | 0.09 ± 0.01 | 0.11 ± 0.01 | 0.00 ± 0.00 | 3.52 ± 0.38 | 1.97 ± 0.22 |             |             |             |             |             |
|      |             |             |             |             | 150  | 4.59 ± 0.48 | 0.02 ± 0.00 | 14.9 ± 1.5   | 0.02 ± 0.01 | 0.12 ± 0.01 | 0.01 ± 0.00 | 5.61 ± 0.60 | 3.79 ± 0.43 |             |             |             |             |             |
|      |             |             |             |             | 100  | 3.89 ± 0.40 | 0.02 ± 0.00 | 12.4 ± 1.4   | 0.01 ± 0.00 | 0.10 ± 0.01 | 0.01 ± 0.00 | 10.5 ± 1.2  | 6.62 ± 0.72 |             |             |             |             |             |
|      |             |             |             |             | 80   | 1.32 ± 0.14 | 0.31 ± 0.03 | 4.39 ± 0.48  | 0.99 ± 0.11 | 0.04 ± 0.00 | 0.02 ± 0.00 | 11.6 ± 1.2  | 10.1 ± 1.1  |             |             |             |             |             |
|      |             |             |             |             | 60   | 1.36 ± 0.15 | 0.03 ± 0.00 | 4.77 ± 0.49  | 0.01 ± 0.00 | 0.04 ± 0.00 | 0.02 ± 0.00 | 15.5 ± 1.6  | 17.0 ± 1.7  |             |             |             |             |             |
|      |             |             |             |             | 40   | 4.35 ± 0.47 | 0.01 ± 0.00 | 5.80 ± 0.62  | bdl         | 0.18 ± 0.02 | 0.06 ± 0.01 | 74.7 ± 8.0  | 60.2 ± 6.1  |             |             |             |             |             |
|      |             |             |             |             | 30   | 0.67 ± 0.07 | 0.04 ± 0.00 | 1.87 ± 0.20  | bdl         |             |             |             |             |             |             |             |             |             |

|     |             |             |             |             |             |             |            |             |
|-----|-------------|-------------|-------------|-------------|-------------|-------------|------------|-------------|
| 140 | 30.1 ± 4.5  | 0.04 ± 0.01 | 94.4 ± 12.6 | 0.18 ± 0.02 | 0.63 ± 0.07 | 0.00 ± 0.00 | 12.9 ± 1.5 | 3.99 ± 0.48 |
| 36  | 0.73 ± 0.10 | 0.06 ± 0.01 | 1.87 ± 0.21 | bdl         | 0.05 ± 0.01 | 0.08 ± 0.05 | 45.2 ± 4.8 | 51.7 ± 8.8  |
| 10  | 0.78 ± 0.17 | 0.01 ± 0.00 | 1.93 ± 0.24 | bdl         | 0.01 ± 0.00 | 0.01 ± 0.00 | 17.4 ± 7.6 | 17.4 ± 1.9  |

## Supplementary material

TS2: Estimated lithogenic PFe (in  $\text{nmol L}^{-1}$  and in % of the total PFe concentration), non lithogenic PFe ( $\text{nmol L}^{-1}$ ), sedimentary PMn (in  $\text{nmol L}^{-1}$  and in % of the total PMn concentration).

| Station [#] | Latitude [°N] | Longitude [°W] | Sampling Date (dd/mm/yy) | Bottom Depth (m) | Depth [m] | PFe <sub>litho</sub> [ $\text{nmol L}^{-1}$ ] | PFe <sub>litho</sub> [%] | PFe <sub>non-litho</sub> [ $\text{nmol L}^{-1}$ ] | Mn <sub>sediment</sub> [ $\text{nmol L}^{-1}$ ] | Mn <sub>sediment</sub> [%] |
|-------------|---------------|----------------|--------------------------|------------------|-----------|-----------------------------------------------|--------------------------|---------------------------------------------------|-------------------------------------------------|----------------------------|
| 1           | 40.333        | -10.036        | 20/05/2014               | 3590             | 3575      | 6.64                                          | 100                      | 0.00                                              | 0.11                                            | 81                         |
|             |               |                |                          |                  | 3400      | 3.61                                          | 100                      | 0.00                                              | 0.06                                            | 70                         |
|             |               |                |                          |                  | 3253      | 7.42                                          | 100                      | 0.00                                              | 0.12                                            | 57                         |
|             |               |                |                          |                  | 2999      | 7.80                                          | 100                      | 0.00                                              | 0.13                                            | 91                         |
|             |               |                |                          |                  | 2501      | 3.91                                          | 99                       | 0.03                                              | 0.06                                            | 53                         |
|             |               |                |                          |                  | 2001      | 3.42                                          | 96                       | 0.13                                              | 0.06                                            | 43                         |
|             |               |                |                          |                  | 1599      | 3.11                                          | 95                       | 0.17                                              | 0.05                                            | 41                         |
|             |               |                |                          |                  | 1400      | 2.15                                          | 100                      | 0.00                                              | 0.04                                            | 33                         |
|             |               |                |                          |                  | 1198      | 2.03                                          | 91                       | 0.20                                              | 0.03                                            | 26                         |
|             |               |                |                          |                  | 1001      | 4.08                                          | 95                       | 0.20                                              | 0.07                                            | 31                         |
|             |               |                |                          |                  | 849       | 4.14                                          | 100                      | 0.00                                              | 0.07                                            | 40                         |
|             |               |                |                          |                  | 700       | 4.15                                          | 100                      | 0.00                                              | 0.07                                            | 45                         |
|             |               |                |                          |                  | 597       | 5.53                                          | 100                      | 0.03                                              | 0.09                                            | 57                         |
|             |               |                |                          |                  | 499       | 3.67                                          | 100                      | 0.00                                              | 0.06                                            | 78                         |
|             |               |                |                          |                  | 400       | 4.74                                          | 100                      | 0.00                                              | 0.08                                            | 49                         |
|             |               |                |                          |                  | 300       | 8.37                                          | 100                      | 0.00                                              | 0.14                                            | 55                         |
|             |               |                |                          |                  | 200       | 6.44                                          | 99                       | 0.10                                              | 0.10                                            | 40                         |
|             |               |                |                          |                  | 150       | 3.69                                          | 100                      | 0.00                                              | 0.06                                            | 21                         |
|             |               |                |                          |                  | 125       | 2.08                                          | 95                       | 0.10                                              | 0.03                                            | 15                         |
|             |               |                |                          |                  | 100       | 2.16                                          | 98                       | 0.05                                              | 0.03                                            | 17                         |
| 80          | 1.92          | 96             | 0.08                     | 0.03             | 19        |                                               |                          |                                                   |                                                 |                            |
| 60          | 1.11          | 100            | 0.00                     | 0.02             | 29        |                                               |                          |                                                   |                                                 |                            |
| 40          | 0.37          | 100            | 0.00                     | 0.01             | 33        |                                               |                          |                                                   |                                                 |                            |
| 20          | 0.74          | 96             | 0.03                     | 0.01             | 33        |                                               |                          |                                                   |                                                 |                            |
| 2           | 40.333        | -9.459         | 21/05/2014               | 153.5            | 138.5     | 304                                           | 100                      | 0.00                                              | 2.51                                            | 100                        |
|             |               |                |                          |                  | 119.5     | 15.9                                          | 100                      | 0.00                                              | 0.27                                            | 47                         |
|             |               |                |                          |                  | 100       | 6.29                                          | 100                      | 0.00                                              | 0.10                                            | 32                         |
|             |               |                |                          |                  | 75        | 4.56                                          | 94                       | 0.29                                              | 0.07                                            | 25                         |
|             |               |                |                          |                  | 50        | 1.66                                          | 88                       | 0.23                                              | 0.03                                            | 13                         |
|             |               |                |                          |                  | 36        | 1.32                                          | 81                       | 0.31                                              | 0.02                                            | 12                         |
|             |               |                |                          |                  | 20        | 1.41                                          | 56                       | 1.12                                              | 0.02                                            | 12                         |
| 4           | 40.333        | -9.767         | 21/05/2014               | 804              | 800       | 9.82                                          | 100                      | 0.00                                              | 0.17                                            | 59                         |
|             |               |                |                          |                  | 700       | 11.8                                          | 100                      | 0.00                                              | 0.18                                            | 77                         |
|             |               |                |                          |                  | 600       | 10.0                                          | 100                      | 0.00                                              | 0.20                                            | 81                         |
|             |               |                |                          |                  | 501       | 2.77                                          | 100                      | 0.00                                              | 0.18                                            | 85                         |
|             |               |                |                          |                  | 400       | 2.38                                          | 100                      | 0.00                                              | 0.05                                            | 29                         |
|             |               |                |                          |                  | 300       | 4.53                                          | 100                      | 0.00                                              | 0.04                                            | 24                         |
|             |               |                |                          |                  | 200       | 3.08                                          | 100                      | 0.00                                              | 0.08                                            | 37                         |
|             |               |                |                          |                  | 149       | 1.35                                          | 100                      | 0.00                                              | 0.05                                            | 29                         |
|             |               |                |                          |                  | 70        | 0.60                                          | 100                      | 0.00                                              | 0.03                                            | 39                         |
|             |               |                |                          |                  | 38        | 0.02                                          | 100                      | 0.00                                              | 0.01                                            | 54                         |
| 20          | 1.90          | 100            | 0.00                     | ND               | ND        |                                               |                          |                                                   |                                                 |                            |
| 11          | 40.333        | -12.219        | 23/05/2014               | 5360             | 5347      | 1.38                                          | 100                      | 0.00                                              | 0.04                                            | 55                         |



|    |        |         |            |      |      |      |     |      |      |    |
|----|--------|---------|------------|------|------|------|-----|------|------|----|
|    |        |         |            |      | 5000 | 1.01 | 100 | 0.00 | 0.03 | 49 |
|    |        |         |            |      | 4000 | 2.25 | 100 | 0.00 | 0.02 | 41 |
|    |        |         |            |      | 2998 | 7.11 | 92  | 0.63 | 0.04 | 53 |
|    |        |         |            |      | 2500 | 4.69 | 96  | 0.17 | 0.12 | 60 |
|    |        |         |            |      | 2000 | 1.78 | 100 | 0.00 | 0.08 | 51 |
|    |        |         |            |      | 1599 | 1.18 | 95  | 0.06 | 0.03 | 40 |
|    |        |         |            |      | 1200 | 1.07 | 90  | 0.11 | 0.02 | 23 |
|    |        |         |            |      | 1001 | 0.55 | 100 | 0.00 | 0.02 | 20 |
|    |        |         |            |      | 800  | 0.51 | 100 | 0.00 | 0.01 | 13 |
|    |        |         |            |      | 701  | 0.53 | 100 | 0.00 | 0.01 | 12 |
|    |        |         |            |      | 501  | 0.94 | 84  | 0.18 | 0.01 | 8  |
|    |        |         |            |      | 301  | 0.26 | 100 | 0.00 | 0.02 | 10 |
|    |        |         |            |      | 201  | 0.25 | 100 | 0.00 | 0.01 | 6  |
|    |        |         |            |      | 101  | 0.26 | 100 | 0.00 | 0.01 | 7  |
|    |        |         |            |      | 80   | ND   | ND  | ND   | 0.01 | 13 |
|    |        |         |            |      | 25   | 0.29 | 100 | 0.00 | 0.01 | 32 |
|    |        |         |            |      | 15   | 1.14 | 100 | 0.00 | 0.02 | 50 |
| 13 | 41.383 | -13.888 | 25/05/2014 | 5455 | 5440 | 2.52 | 79  | 0.65 | 0.04 | 33 |
|    |        |         |            |      | 5000 | 1.06 | 82  | 0.23 | 0.02 | 26 |
|    |        |         |            |      | 4000 | 0.79 | 83  | 0.17 | 0.01 | 24 |
|    |        |         |            |      | 2997 | 0.91 | 80  | 0.24 | 0.01 | 21 |
|    |        |         |            |      | 2500 | 1.67 | 85  | 0.29 | 0.03 | 24 |
|    |        |         |            |      | 2000 | 1.40 | 89  | 0.17 | 0.02 | 21 |
|    |        |         |            |      | 1500 | 0.99 | 76  | 0.32 | 0.02 | 16 |
|    |        |         |            |      | 1200 | 0.90 | 73  | 0.32 | 0.01 | 12 |
|    |        |         |            |      | 1000 | 0.46 | 66  | 0.24 | 0.01 | 7  |
|    |        |         |            |      | 798  | 1.00 | 77  | 0.30 | 0.02 | 12 |
|    |        |         |            |      | 600  | 0.81 | 77  | 0.24 | 0.01 | 8  |
|    |        |         |            |      | 500  | 0.72 | 65  | 0.38 | 0.01 | 5  |
|    |        |         |            |      | 300  | 0.56 | 89  | 0.07 | 0.01 | 7  |
|    |        |         |            |      | 200  | 0.42 | 84  | 0.08 | 0.01 | 5  |
|    |        |         |            |      | 150  | 0.41 | 75  | 0.13 | 0.01 | 5  |
|    |        |         |            |      | 125  | 0.36 | 85  | 0.06 | 0.01 | 5  |
|    |        |         |            |      | 100  | 0.45 | 80  | 0.12 | 0.01 | 6  |
|    |        |         |            |      | 80   | 0.44 | 100 | 0.00 | 0.01 | 17 |
|    |        |         |            |      | 60   | 0.15 | 100 | 0.00 | 0.01 | 10 |
|    |        |         |            |      | 40   | 0.05 | 100 | 0.00 | 0.02 | 29 |
|    |        |         |            |      | 25   | 0.10 | 100 | 0.00 | 0.01 | 9  |
|    |        |         |            |      | 15   | 0.15 | 100 | 0.00 | 0.01 | 8  |
| 15 | 42.581 | -15.461 | 26/05/2014 | 5135 | 5121 | 2.31 | 90  | 0.27 | 0.04 | 34 |
|    |        |         |            |      | 5004 | 1.81 | 87  | 0.26 | 0.03 | 32 |
|    |        |         |            |      | 4001 | 0.89 | 90  | 0.10 | 0.01 | 27 |
|    |        |         |            |      | 3001 | 1.04 | 92  | 0.09 | 0.02 | 22 |
|    |        |         |            |      | 2500 | 0.85 | 85  | 0.15 | 0.01 | 17 |
|    |        |         |            |      | 2000 | 0.85 | 80  | 0.21 | 0.01 | 15 |
|    |        |         |            |      | 1800 | 1.15 | 84  | 0.22 | 0.02 | 17 |
|    |        |         |            |      | 1600 | ND   | ND  | ND   | ND   | ND |
|    |        |         |            |      | 1400 | 0.78 | 90  | 0.08 | 0.01 | 15 |
|    |        |         |            |      | 1100 | 0.84 | 84  | 0.16 | 0.01 | 13 |
|    |        |         |            |      | 1000 | 0.98 | 88  | 0.14 | 0.02 | 15 |

|    |        |         |            |      |       |      |     |      |      |     |
|----|--------|---------|------------|------|-------|------|-----|------|------|-----|
|    |        |         |            |      | 800   | 1.30 | 83  | 0.26 | 0.02 | 18  |
|    |        |         |            |      | 650   | 1.38 | 97  | 0.04 | 0.02 | 18  |
|    |        |         |            |      | 400   | 0.75 | 100 | 0.00 | 0.01 | 8   |
|    |        |         |            |      | 300   | 0.48 | 100 | 0.00 | 0.01 | 5   |
|    |        |         |            |      | 100   | 0.30 | 100 | 0.00 | 0.01 | 7   |
|    |        |         |            |      | 70.5  | 0.66 | 100 | 0.00 | 0.01 | 13  |
|    |        |         |            |      | 60.2  | 0.17 | 100 | 0.00 | 0.01 | 18  |
|    |        |         |            |      | 49.9  | 0.12 | 100 | 0.00 | 0.01 | 20  |
|    |        |         |            |      | 29.9  | 0.19 | 100 | 0.00 | 0.01 | 11  |
|    |        |         |            |      | 20.08 | 0.18 | 100 | 0.00 | 0.01 | 15  |
| 17 | 43.780 | -17.031 | 27/05/2014 | 4080 | 4062  | 1.13 | 99  | 0.01 | 0.02 | 16  |
|    |        |         |            |      | 3500  | 0.71 | 94  | 0.05 | 0.01 | 17  |
|    |        |         |            |      | 3000  | 0.65 | 100 | 0.00 | 0.01 | 15  |
|    |        |         |            |      | 2500  | 0.82 | 98  | 0.01 | 0.01 | 14  |
|    |        |         |            |      | 2002  | 0.68 | 90  | 0.07 | 0.01 | 11  |
|    |        |         |            |      | 1800  | 0.63 | 100 | 0.00 | 0.01 | 11  |
|    |        |         |            |      | 1600  | 0.81 | 100 | 0.00 | 0.01 | 14  |
|    |        |         |            |      | 1400  | 0.50 | 99  | 0.00 | 0.01 | 11  |
|    |        |         |            |      | 1200  | 0.54 | 100 | 0.00 | 0.01 | 11  |
|    |        |         |            |      | 1000  | 0.57 | 83  | 0.12 | 0.01 | 9   |
|    |        |         |            |      | 800   | 0.74 | 100 | 0.00 | 0.01 | 11  |
|    |        |         |            |      | 600   | 0.87 | 86  | 0.14 | 0.01 | 11  |
|    |        |         |            |      | 500   | 0.53 | 100 | 0.00 | 0.01 | 10  |
|    |        |         |            |      | 400   | 0.63 | 100 | 0.00 | 0.01 | 8   |
|    |        |         |            |      | 351   | 0.44 | 100 | 0.00 | 0.01 | 6   |
|    |        |         |            |      | 200   | 0.28 | 100 | 0.00 | 0.01 | 11  |
|    |        |         |            |      | 100   | 0.13 | 100 | 0.00 | 0.01 | 12  |
|    |        |         |            |      | 70    | 0.15 | 100 | 0.00 | 0.01 | 30  |
|    |        |         |            |      | 60    | 0.28 | 100 | 0.00 | 0.01 | 33  |
|    |        |         |            |      | 45    | 0.10 | 100 | 0.00 | 0.01 | 13  |
|    |        |         |            |      | 30    | 0.09 | 100 | 0.00 | 0.01 | 15  |
|    |        |         |            |      | 15    | 0.20 | 100 | 0.00 | 0.01 | 13  |
| 19 | 45.051 | -18.505 | 28/05/2014 | 4640 | 4625  | 1.20 | 85  | 0.20 | 0.02 | 15  |
|    |        |         |            |      | 3999  | 0.61 | 86  | 0.10 | 0.01 | 15  |
|    |        |         |            |      | 3000  | 0.60 | 85  | 0.10 | 0.01 | 13  |
|    |        |         |            |      | 2500  | 0.43 | 83  | 0.09 | 0.01 | 10  |
|    |        |         |            |      | 2000  | ND   | ND  | ND   | 0.00 | 100 |
|    |        |         |            |      | 1800  | 0.63 | 83  | 0.12 | 0.01 | 9   |
|    |        |         |            |      | 1601  | 0.50 | 86  | 0.08 | 0.01 | 8   |
|    |        |         |            |      | 1402  | 0.47 | 84  | 0.09 | 0.01 | 8   |
|    |        |         |            |      | 1200  | 0.53 | 100 | 0.00 | 0.01 | 11  |
|    |        |         |            |      | 1000  | 0.55 | 89  | 0.07 | 0.01 | 9   |
|    |        |         |            |      | 800   | 0.48 | 83  | 0.10 | 0.01 | 6   |
|    |        |         |            |      | 600   | 0.27 | 100 | 0.00 | 0.00 | 4   |
|    |        |         |            |      | 500   | 0.37 | 100 | 0.00 | 0.01 | 6   |
|    |        |         |            |      | 401   | 0.37 | 93  | 0.03 | 0.01 | 6   |
|    |        |         |            |      | 300   | 0.24 | 100 | 0.00 | 0.00 | 5   |
|    |        |         |            |      | 201   | 0.32 | 25  | 0.98 | 0.01 | 6   |
|    |        |         |            |      | 100   | 0.32 | 100 | 0.00 | 0.01 | 7   |
|    |        |         |            |      | 50    | 0.13 | 100 | 0.00 | 0.00 | 10  |

|    |        |         |            |      |      |      |     |      |      |    |
|----|--------|---------|------------|------|------|------|-----|------|------|----|
|    |        |         |            |      | 40   | 0.05 | 100 | 0.00 | 0.00 | 8  |
|    |        |         |            |      | 30   | 0.07 | 100 | 0.00 | 0.00 | 8  |
|    |        |         |            |      | 20   | 0.04 | 100 | 0.00 | 0.00 | 9  |
| 21 | 46.544 | -19.672 | 01/06/2014 | 4607 | 4592 | 1.87 | 76  | 0.58 | 0.03 | 16 |
|    |        |         |            |      | 4499 | 1.83 | 73  | 0.66 | 0.03 | 16 |
|    |        |         |            |      | 3500 | 0.55 | 68  | 0.25 | 0.01 | 9  |
|    |        |         |            |      | 2999 | 0.46 | 55  | 0.39 | 0.01 | 6  |
|    |        |         |            |      | 2800 | 0.60 | 53  | 0.53 | 0.01 | 7  |
|    |        |         |            |      | 2299 | 0.47 | 55  | 0.38 | 0.01 | 6  |
|    |        |         |            |      | 2001 | 0.44 | 56  | 0.34 | 0.01 | 6  |
|    |        |         |            |      | 1501 | 0.47 | 58  | 0.34 | 0.01 | 7  |
|    |        |         |            |      | 1250 | 0.49 | 71  | 0.20 | 0.01 | 7  |
|    |        |         |            |      | 1000 | 0.44 | 73  | 0.16 | 0.01 | 6  |
|    |        |         |            |      | 799  | 0.49 | 79  | 0.13 | 0.01 | 5  |
|    |        |         |            |      | 700  | 0.51 | 85  | 0.09 | 0.01 | 6  |
|    |        |         |            |      | 600  | 0.37 | 100 | 0.00 | 0.01 | 6  |
|    |        |         |            |      | 499  | 0.25 | 100 | 0.00 | 0.00 | 6  |
|    |        |         |            |      | 400  | 0.35 | 100 | 0.00 | 0.01 | 10 |
|    |        |         |            |      | 300  | 0.35 | 100 | 0.00 | 0.01 | 4  |
|    |        |         |            |      | 200  | 0.36 | 100 | 0.00 | 0.01 | 5  |
|    |        |         |            |      | 100  | 0.18 | 100 | 0.00 | 0.01 | 15 |
|    |        |         |            |      | 80   | 0.19 | 100 | 0.00 | 0.01 | 16 |
|    |        |         |            |      | 50   | 0.16 | 100 | 0.00 | 0.00 | 13 |
|    |        |         |            |      | 30   | ND   | ND  | ND   | 0.01 | 5  |
|    |        |         |            |      | 20   | ND   | ND  | ND   | 0.01 | 4  |
| 23 | 48.039 | -20.848 | 02/06/2014 | 4455 | 4000 | 1.40 | 92  | 0.12 | 0.02 | 19 |
|    |        |         |            |      | 3500 | 1.56 | 100 | 0.00 | 0.03 | 21 |
|    |        |         |            |      | 3000 | 2.41 | 100 | 0.00 | 0.05 | 21 |
|    |        |         |            |      | 2300 | 0.46 | 41  | 0.66 | 0.01 | 6  |
|    |        |         |            |      | 2000 | 0.39 | 53  | 0.36 | 0.01 | 5  |
|    |        |         |            |      | 1800 | 0.40 | 49  | 0.41 | 0.01 | 6  |
|    |        |         |            |      | 1600 | 0.38 | 56  | 0.30 | 0.01 | 5  |
|    |        |         |            |      | 1400 | 0.42 | 58  | 0.30 | 0.01 | 6  |
|    |        |         |            |      | 1200 | 0.39 | 51  | 0.38 | 0.01 | 5  |
|    |        |         |            |      | 800  | 0.34 | 77  | 0.10 | 0.01 | 4  |
|    |        |         |            |      | 400  | 0.23 | 100 | 0.00 | 0.00 | 4  |
|    |        |         |            |      | 200  | 0.17 | 100 | 0.00 | 0.00 | 5  |
|    |        |         |            |      | 100  | 0.24 | 100 | 0.00 | 0.01 | 6  |
|    |        |         |            |      | 70   | 0.19 | 100 | 0.00 | 0.01 | 12 |
|    |        |         |            |      | 60   | 0.13 | 100 | 0.00 | 0.01 | 21 |
|    |        |         |            |      | 40   | 0.31 | 100 | 0.00 | 0.01 | 21 |
|    |        |         |            |      | 30   | 0.22 | 100 | 0.00 | 0.01 | 9  |
|    |        |         |            |      | 20   | 0.29 | 100 | 0.00 | 0.01 | 8  |
| 25 | 49.529 | -22.017 | 03/06/2014 | 4168 | 4269 | 3.34 | 86  | 0.54 | 0.05 | 15 |
|    |        |         |            |      | 4000 | 1.65 | 78  | 0.46 | 0.03 | 12 |
|    |        |         |            |      | 3500 | 0.83 | 70  | 0.36 | 0.01 | 9  |
|    |        |         |            |      | 3000 | 0.80 | 63  | 0.47 | 0.01 | 8  |
|    |        |         |            |      | 2600 | 0.54 | 48  | 0.59 | 0.01 | 7  |
|    |        |         |            |      | 2000 | 0.58 | 80  | 0.15 | 0.01 | 8  |
|    |        |         |            |      | 1800 | 0.52 | 59  | 0.36 | 0.01 | 6  |

|    |        |         |            |      |      |      |     |      |      |    |
|----|--------|---------|------------|------|------|------|-----|------|------|----|
|    |        |         |            |      | 1600 | 0.52 | 63  | 0.30 | 0.01 | 6  |
|    |        |         |            |      | 1400 | 0.49 | 63  | 0.30 | 0.01 | 6  |
|    |        |         |            |      | 1200 | 0.43 | 69  | 0.19 | 0.01 | 5  |
|    |        |         |            |      | 1000 | 0.45 | 69  | 0.20 | 0.01 | 5  |
|    |        |         |            |      | 800  | 0.51 | 100 | 0.00 | 0.01 | 7  |
|    |        |         |            |      | 650  | 0.40 | 100 | 0.00 | 0.01 | 6  |
|    |        |         |            |      | 499  | 0.34 | 100 | 0.00 | 0.01 | 6  |
|    |        |         |            |      | 349  | 0.03 | 100 | 0.00 | 0.00 | 8  |
|    |        |         |            |      | 200  | 0.15 | 100 | 0.00 | 0.00 | 10 |
|    |        |         |            |      | 100  | 0.18 | 100 | 0.00 | 0.01 | 19 |
|    |        |         |            |      | 75   | 0.15 | 100 | 0.00 | 0.01 | 19 |
|    |        |         |            |      | 50   | 0.15 | 100 | 0.00 | 0.01 | 17 |
|    |        |         |            |      | 35   | 0.41 | 100 | 0.00 | 0.01 | 19 |
|    |        |         |            |      | 25   | 0.25 | 100 | 0.00 | 0.01 | 5  |
|    |        |         |            |      | 15   | 0.34 | 99  | 0.00 | 0.01 | 3  |
| 26 | 50.278 | -22.605 | 04/06/2014 | 4207 | 4192 | 8.48 | 100 | 0.00 | 0.14 | 15 |
|    |        |         |            |      | 4000 | 0.71 | 91  | 0.07 | 0.01 | 13 |
|    |        |         |            |      | 3000 | 0.73 | 64  | 0.41 | 0.01 | 8  |
|    |        |         |            |      | 2300 | 0.52 | 54  | 0.44 | 0.01 | 7  |
|    |        |         |            |      | 2000 | 0.64 | 68  | 0.30 | 0.01 | 8  |
|    |        |         |            |      | 1600 | 0.56 | 55  | 0.46 | 0.01 | 6  |
|    |        |         |            |      | 1400 | 0.41 | 57  | 0.31 | 0.01 | 5  |
|    |        |         |            |      | 1200 | 0.54 | 73  | 0.20 | 0.01 | 6  |
|    |        |         |            |      | 1000 | 0.41 | 67  | 0.20 | 0.01 | 5  |
|    |        |         |            |      | 900  | 0.44 | 73  | 0.16 | 0.01 | 5  |
|    |        |         |            |      | 750  | 0.55 | 78  | 0.15 | 0.01 | 5  |
|    |        |         |            |      | 600  | 0.53 | 92  | 0.05 | 0.01 | 6  |
|    |        |         |            |      | 500  | 0.40 | 93  | 0.03 | 0.01 | 5  |
|    |        |         |            |      | 400  | 0.28 | 84  | 0.05 | 0.00 | 4  |
|    |        |         |            |      | 300  | 0.26 | 100 | 0.00 | 0.00 | 4  |
|    |        |         |            |      | 200  | 0.33 | 89  | 0.04 | 0.01 | 8  |
|    |        |         |            |      | 131  | 0.08 | 40  | 0.13 | 0.00 | 7  |
|    |        |         |            |      | 99   | 0.07 | 56  | 0.05 | 0.00 | 16 |
|    |        |         |            |      | 70   | 0.09 | 100 | 0.00 | 0.00 | 5  |
|    |        |         |            |      | 50   | 0.17 | 100 | 0.00 | 0.00 | 8  |
|    |        |         |            |      | 35   | 0.24 | 100 | 0.00 | 0.00 | 6  |
|    |        |         |            |      | 20   | 0.31 | 83  | 0.07 | 0.01 | 5  |
| 29 | 53.020 | -24.752 | 05/06/2014 | 3556 | 3584 | 8.95 | 87  | 1.38 | 0.14 | 11 |
|    |        |         |            |      | 3000 | 1.02 | 49  | 1.06 | 0.02 | 8  |
|    |        |         |            |      | 2500 | 0.62 | 48  | 0.66 | 0.01 | 7  |
|    |        |         |            |      | 2000 | 0.73 | 61  | 0.47 | 0.01 | 9  |
|    |        |         |            |      | 1800 | 0.93 | 72  | 0.37 | 0.02 | 10 |
|    |        |         |            |      | 1600 | 0.84 | 56  | 0.66 | 0.01 | 8  |
|    |        |         |            |      | 1400 | 0.81 | 59  | 0.56 | 0.01 | 8  |
|    |        |         |            |      | 1200 | 1.04 | 73  | 0.39 | 0.02 | 10 |
|    |        |         |            |      | 1100 | 0.77 | 63  | 0.44 | 0.01 | 7  |
|    |        |         |            |      | 900  | 1.03 | 94  | 0.07 | 0.02 | 9  |
|    |        |         |            |      | 800  | 0.78 | 68  | 0.37 | 0.01 | 7  |
|    |        |         |            |      | 600  | 0.61 | 66  | 0.32 | 0.01 | 6  |
|    |        |         |            |      | 500  | 0.57 | 87  | 0.08 | 0.01 | 6  |

|    |        |         |            |      |      |      |     |      |      |    |
|----|--------|---------|------------|------|------|------|-----|------|------|----|
|    |        |         |            |      | 401  | 0.53 | 76  | 0.16 | 0.01 | 5  |
|    |        |         |            |      | 300  | 0.42 | 83  | 0.09 | 0.01 | 7  |
|    |        |         |            |      | 200  | 0.29 | 87  | 0.04 | 0.00 | 6  |
|    |        |         |            |      | 150  | 0.26 | 93  | 0.02 | 0.00 | 12 |
|    |        |         |            |      | 100  | 0.22 | 97  | 0.01 | 0.00 | 16 |
|    |        |         |            |      | 75   | 0.13 | 51  | 0.12 | 0.00 | 8  |
|    |        |         |            |      | 50   | 0.10 | 57  | 0.08 | 0.00 | 5  |
|    |        |         |            |      | 25   | 0.15 | 65  | 0.08 | 0.00 | 4  |
|    |        |         |            |      | 15   | 0.18 | 50  | 0.18 | 0.00 | 5  |
| 32 | 55.515 | -26.703 | 08/06/2014 | 3284 | 3271 | 21.3 | 52  | 19.4 | 0.34 | 12 |
|    |        |         |            |      | 3230 | 14.5 | 49  | 14.9 | 0.23 | 11 |
|    |        |         |            |      | 3000 | 2.63 | 43  | 3.50 | 0.04 | 9  |
|    |        |         |            |      | 2500 | 0.59 | 50  | 0.58 | 0.01 | 7  |
|    |        |         |            |      | 2000 | 0.82 | 53  | 0.71 | 0.01 | 8  |
|    |        |         |            |      | 1750 | 0.72 | 52  | 0.66 | 0.01 | 7  |
|    |        |         |            |      | 1500 | 0.71 | 58  | 0.51 | 0.01 | 7  |
|    |        |         |            |      | 1250 | 0.64 | 60  | 0.42 | 0.01 | 6  |
|    |        |         |            |      | 1000 | 0.55 | 63  | 0.33 | 0.01 | 5  |
|    |        |         |            |      | 800  | 0.68 | 66  | 0.36 | 0.01 | 6  |
|    |        |         |            |      | 700  | 0.52 | 99  | 0.01 | 0.01 | 6  |
|    |        |         |            |      | 600  | 0.55 | 79  | 0.14 | 0.01 | 6  |
|    |        |         |            |      | 500  | 0.60 | 75  | 0.20 | 0.01 | 6  |
|    |        |         |            |      | 401  | 0.19 | 98  | 0.00 | 0.00 | 7  |
|    |        |         |            |      | 300  | ND   | ND  | ND   | 0.00 | 5  |
|    |        |         |            |      | 200  | 0.18 | 90  | 0.02 | 0.00 | 20 |
|    |        |         |            |      | 100  | 0.23 | 89  | 0.03 | 0.00 | 13 |
|    |        |         |            |      | 60   | 0.13 | 63  | 0.07 | 0.00 | 6  |
|    |        |         |            |      | 50   | 0.02 | 100 | 0.00 | 0.00 | 6  |
|    |        |         |            |      | 40   | ND   | ND  | ND   | ND   | ND |
|    |        |         |            |      | 30   | 0.17 | 56  | 0.14 | 0.00 | 3  |
|    |        |         |            |      | 15   | 0.08 | 32  | 0.16 | 0.00 | 3  |
| 34 | 57.004 | -27.879 | 09/06/2014 | 2751 | 2777 | 6.11 | 45  | 7.47 | 0.10 | 9  |
|    |        |         |            |      | 2600 | 3.40 | 45  | 4.09 | 0.05 | 8  |
|    |        |         |            |      | 2600 | 2.39 | 44  | 3.07 | 0.04 | 8  |
|    |        |         |            |      | 2400 | 1.05 | 39  | 1.66 | 0.02 | 8  |
|    |        |         |            |      | 2100 | 0.68 | 49  | 0.72 | 0.01 | 7  |
|    |        |         |            |      | 1800 | 0.53 | 49  | 0.55 | 0.01 | 6  |
|    |        |         |            |      | 1600 | 0.58 | 52  | 0.54 | 0.01 | 5  |
|    |        |         |            |      | 1400 | 0.46 | 55  | 0.38 | 0.01 | 5  |
|    |        |         |            |      | 1200 | 0.38 | 55  | 0.31 | 0.01 | 4  |
|    |        |         |            |      | 1000 | 0.36 | 55  | 0.29 | 0.01 | 4  |
|    |        |         |            |      | 850  | 0.42 | 51  | 0.40 | 0.01 | 5  |
|    |        |         |            |      | 700  | 0.53 | 80  | 0.13 | 0.01 | 7  |
|    |        |         |            |      | 600  | 0.51 | 69  | 0.23 | 0.01 | 7  |
|    |        |         |            |      | 450  | 0.58 | 69  | 0.26 | 0.01 | 7  |
|    |        |         |            |      | 380  | 0.49 | 76  | 0.15 | 0.01 | 7  |
|    |        |         |            |      | 300  | 0.35 | 81  | 0.08 | 0.01 | 11 |
|    |        |         |            |      | 200  | 0.36 | 84  | 0.07 | 0.01 | 15 |
|    |        |         |            |      | 100  | 0.20 | 84  | 0.04 | 0.00 | 13 |
|    |        |         |            |      | 60   | 0.10 | 55  | 0.08 | 0.00 | 6  |

|    |        |         |            |      |      |      |     |      |      |    |
|----|--------|---------|------------|------|------|------|-----|------|------|----|
|    |        |         |            |      | 45   | 0.10 | 51  | 0.10 | 0.00 | 5  |
|    |        |         |            |      | 28   | 0.11 | 47  | 0.12 | 0.00 | 3  |
|    |        |         |            |      | 10   | 0.10 | 66  | 0.05 | 0.00 | 3  |
| 36 | 58.207 | -29.725 | 10/06/2014 | 2224 | 2245 | 11.8 | 43  | 15.7 | 0.19 | 17 |
|    |        |         |            |      | 1800 | 1.87 | 41  | 2.70 | 0.03 | 13 |
|    |        |         |            |      | 1500 | 0.79 | 37  | 1.32 | 0.01 | 10 |
|    |        |         |            |      | 1220 | 0.41 | 45  | 0.51 | 0.01 | 5  |
|    |        |         |            |      | 850  | 0.36 | 44  | 0.47 | 0.01 | 6  |
|    |        |         |            |      | 500  | 0.88 | 44  | 1.11 | 0.01 | 6  |
|    |        |         |            |      | 250  | 0.39 | 59  | 0.27 | 0.01 | 19 |
|    |        |         |            |      | 125  | 0.01 | 100 | 0.00 | 0.00 | 31 |
|    |        |         |            |      | 70   | 0.25 | 79  | 0.07 | 0.00 | 14 |
|    |        |         |            |      | 40   | 0.10 | 46  | 0.12 | 0.00 | 3  |
|    |        |         |            |      | 20   | 0.10 | 47  | 0.12 | 0.00 | 3  |
| 38 | 58.843 | -31.266 | 10/06/2014 | 1365 | 1354 | 6.04 | 37  | 10.2 | 0.10 | 19 |
|    |        |         |            |      | 1300 | 6.13 | 35  | 11.4 | 0.10 | 18 |
|    |        |         |            |      | 1163 | 5.30 | 36  | 9.41 | 0.09 | 18 |
|    |        |         |            |      | 1000 | 2.35 | 35  | 4.27 | 0.04 | 14 |
|    |        |         |            |      | 950  | 1.41 | 35  | 2.61 | 0.02 | 14 |
|    |        |         |            |      | 800  | 0.80 | 42  | 1.09 | 0.01 | 14 |
|    |        |         |            |      | 575  | 0.84 | 42  | 1.18 | 0.01 | 12 |
|    |        |         |            |      | 500  | 0.64 | 40  | 0.95 | 0.01 | 13 |
|    |        |         |            |      | 400  | 0.44 | 51  | 0.42 | 0.01 | 16 |
|    |        |         |            |      | 300  | 0.66 | 45  | 0.80 | 0.01 | 20 |
|    |        |         |            |      | 200  | 0.73 | 57  | 0.55 | 0.01 | 29 |
|    |        |         |            |      | 100  | 0.37 | 65  | 0.20 | 0.01 | 38 |
|    |        |         |            |      | 70   | 0.18 | 89  | 0.02 | 0.00 | 18 |
|    |        |         |            |      | 60   | 0.13 | 65  | 0.07 | 0.00 | 6  |
|    |        |         |            |      | 50   | 0.12 | 45  | 0.14 | 0.00 | 7  |
|    |        |         |            |      | 30   | 0.09 | 60  | 0.06 | 0.00 | 4  |
|    |        |         |            |      | 20   | 0.05 | 51  | 0.05 | 0.00 | 1  |
| 40 | 59.102 | -33.828 | 11/06/2014 | 2320 | 2306 | 1.85 | 56  | 1.48 | 0.03 | 13 |
|    |        |         |            |      | 2100 | 0.66 | 33  | 1.35 | 0.01 | 7  |
|    |        |         |            |      | 1600 | 0.58 | 36  | 1.05 | 0.01 | 7  |
|    |        |         |            |      | 1299 | 0.16 | 35  | 0.29 | 0.00 | 6  |
|    |        |         |            |      | 1000 | 0.49 | 35  | 0.91 | 0.01 | 7  |
|    |        |         |            |      | 600  | 0.36 | 39  | 0.57 | 0.01 | 7  |
|    |        |         |            |      | 350  | 0.27 | 57  | 0.21 | 0.00 | 11 |
|    |        |         |            |      | 70   | 0.68 | 100 | 0.00 | 0.01 | 21 |
|    |        |         |            |      | 20   | 0.21 | 50  | 0.20 | 0.00 | 3  |
| 42 | 59.363 | -36.396 | 12/06/2014 | 3150 | 3131 | 19.3 | 45  | 23.7 | 0.31 | 17 |
|    |        |         |            |      | 3100 | 11.2 | 46  | 13.3 | 0.18 | 16 |
|    |        |         |            |      | 2900 | 1.22 | 47  | 1.37 | 0.02 | 11 |
|    |        |         |            |      | 2500 | 0.70 | 40  | 1.05 | 0.01 | 7  |
|    |        |         |            |      | 2250 | 0.67 | 36  | 1.20 | 0.01 | 7  |
|    |        |         |            |      | 2000 | 0.66 | 36  | 1.17 | 0.01 | 7  |
|    |        |         |            |      | 1800 | 0.64 | 38  | 1.04 | 0.01 | 7  |
|    |        |         |            |      | 1600 | 0.79 | 38  | 1.28 | 0.01 | 8  |
|    |        |         |            |      | 1400 | 0.59 | 39  | 0.94 | 0.01 | 7  |
|    |        |         |            |      | 1200 | 0.44 | 43  | 0.58 | 0.01 | 7  |

|    |        |         |            |      |      |      |    |      |      |    |
|----|--------|---------|------------|------|------|------|----|------|------|----|
|    |        |         |            |      | 1050 | 0.65 | 48 | 0.69 | 0.01 | 9  |
|    |        |         |            |      | 900  | 0.53 | 45 | 0.65 | 0.01 | 8  |
|    |        |         |            |      | 700  | 0.64 | 46 | 0.76 | 0.01 | 10 |
|    |        |         |            |      | 500  | 0.46 | 46 | 0.55 | 0.01 | 9  |
|    |        |         |            |      | 401  | 0.43 | 47 | 0.49 | 0.01 | 8  |
|    |        |         |            |      | 300  | 0.39 | 54 | 0.33 | 0.01 | 10 |
|    |        |         |            |      | 200  | 0.36 | 57 | 0.27 | 0.01 | 11 |
|    |        |         |            |      | 100  | 0.43 | 66 | 0.22 | 0.01 | 18 |
|    |        |         |            |      | 70   | 0.50 | 75 | 0.17 | 0.01 | 17 |
|    |        |         |            |      | 51   | 0.44 | 78 | 0.13 | 0.01 | 11 |
|    |        |         |            |      | 20   | 0.67 | 99 | 0.01 | 0.01 | 4  |
| 44 | 59.623 | -38.954 | 14/06/2014 | 2979 | 2964 | 19.7 | 45 | 23.8 | 0.32 | 20 |
|    |        |         |            |      | 2900 | 11.9 | 44 | 15.2 | 0.19 | 19 |
|    |        |         |            |      | 2800 | 7.84 | 46 | 9.38 | 0.13 | 18 |
|    |        |         |            |      | 2600 | 2.77 | 41 | 4.06 | 0.04 | 13 |
|    |        |         |            |      | 2250 | 0.74 | 40 | 1.12 | 0.01 | 8  |
|    |        |         |            |      | 2000 | 0.76 | 39 | 1.16 | 0.01 | 8  |
|    |        |         |            |      | 1800 | 0.75 | 39 | 1.18 | 0.01 | 7  |
|    |        |         |            |      | 1600 | 0.72 | 41 | 1.05 | 0.01 | 8  |
|    |        |         |            |      | 1400 | 0.66 | 43 | 0.87 | 0.01 | 8  |
|    |        |         |            |      | 1100 | 0.77 | 49 | 0.81 | 0.01 | 9  |
|    |        |         |            |      | 900  | 0.02 | 74 | 0.01 | 0.00 | 13 |
|    |        |         |            |      | 700  | 0.50 | 49 | 0.52 | 0.01 | 13 |
|    |        |         |            |      | 600  | 0.67 | 53 | 0.60 | 0.01 | 14 |
|    |        |         |            |      | 470  | 1.14 | 47 | 1.30 | 0.02 | 10 |
|    |        |         |            |      | 300  | 0.61 | 49 | 0.64 | 0.01 | 13 |
|    |        |         |            |      | 200  | 0.55 | 50 | 0.55 | 0.01 | 11 |
|    |        |         |            |      | 160  | 0.51 | 29 | 1.26 | 0.01 | 12 |
|    |        |         |            |      | 120  | 0.61 | 52 | 0.57 | 0.01 | 11 |
|    |        |         |            |      | 50   | 0.50 | 79 | 0.14 | 0.01 | 29 |
|    |        |         |            |      | 35   | 0.54 | 84 | 0.10 | 0.01 | 3  |
|    |        |         |            |      | 30   | 0.21 | 81 | 0.05 | 0.00 | 3  |
|    |        |         |            |      | 20   | 0.72 | 76 | 0.23 | 0.01 | 3  |
| 49 | 59.773 | -41.297 | 15/06/2014 | 2060 | 2052 | 8.74 | 45 | 10.8 | 0.14 | 20 |
|    |        |         |            |      | 2000 | 8.93 | 45 | 10.8 | 0.14 | 20 |
|    |        |         |            |      | 1900 | 4.35 | 45 | 5.36 | 0.07 | 17 |
|    |        |         |            |      | 1800 | 3.23 | 44 | 4.14 | 0.05 | 16 |
|    |        |         |            |      | 1650 | 3.77 | 44 | 4.79 | 0.06 | 17 |
|    |        |         |            |      | 1500 | 3.16 | 42 | 4.35 | 0.05 | 16 |
|    |        |         |            |      | 1250 | 2.76 | 42 | 3.78 | 0.04 | 15 |
|    |        |         |            |      | 1101 | 1.99 | 41 | 2.81 | 0.03 | 14 |
|    |        |         |            |      | 1000 | 1.93 | 41 | 2.75 | 0.03 | 14 |
|    |        |         |            |      | 901  | 2.17 | 42 | 2.97 | 0.04 | 16 |
|    |        |         |            |      | 801  | 1.76 | 43 | 2.37 | 0.03 | 14 |
|    |        |         |            |      | 700  | 1.50 | 42 | 2.05 | 0.02 | 13 |
|    |        |         |            |      | 600  | 1.35 | 42 | 1.87 | 0.02 | 14 |
|    |        |         |            |      | 550  | 1.81 | 42 | 2.51 | 0.03 | 15 |
|    |        |         |            |      | 400  | 1.97 | 44 | 2.53 | 0.03 | 18 |
|    |        |         |            |      | 300  | 1.77 | 46 | 2.07 | 0.03 | 21 |
|    |        |         |            |      | 200  | 1.52 | 52 | 1.43 | 0.02 | 23 |

|    |        |         |            |      |      |       |     |      |      |     |
|----|--------|---------|------------|------|------|-------|-----|------|------|-----|
|    |        |         |            |      | 102  | 0.88  | 77  | 0.27 | 0.01 | 28  |
|    |        |         |            |      | 80   | 0.76  | 77  | 0.22 | 0.01 | 20  |
|    |        |         |            |      | 61   | 0.51  | 100 | 0.00 | 0.01 | 8   |
|    |        |         |            |      | 40   | 0.41  | 100 | 0.00 | 0.01 | 6   |
|    |        |         |            |      | 20   | 0.45  | 100 | 0.00 | 0.01 | 6   |
| 53 | 59.899 | -43.003 | 17/06/2014 | 180  | 165  | 15.4  | 71  | 6.18 | 0.25 | 40  |
|    |        |         |            |      | 130  | 11.8  | 71  | 4.75 | 0.19 | 37  |
|    |        |         |            |      | 100  | 14.9  | 67  | 7.23 | 0.24 | 31  |
|    |        |         |            |      | 70   | 6.70  | 62  | 4.06 | 0.11 | 24  |
|    |        |         |            |      | 50   | 6.78  | 71  | 2.72 | 0.11 | 25  |
|    |        |         |            |      | 30   | 12.9  | 67  | 6.23 | 0.21 | 35  |
| 56 | 59.823 | -42.399 | 18/06/2014 | 308  | 298  | 4.60  | 70  | 1.99 | 0.07 | 49  |
|    |        |         |            |      | 248  | 3.06  | 70  | 1.31 | 0.05 | 40  |
|    |        |         |            |      | 170  | 3.18  | 75  | 1.06 | 0.05 | 36  |
|    |        |         |            |      | 120  | 1.88  | 72  | 0.75 | 0.03 | 32  |
|    |        |         |            |      | 60   | 2.41  | 70  | 1.05 | 0.04 | 38  |
|    |        |         |            |      | 40   | 3.83  | 67  | 1.85 | 0.06 | 40  |
|    |        |         |            |      | 20   | 5.74  | 70  | 2.47 | 0.09 | 41  |
| 60 | 59.799 | -42.003 | 17/06/2014 | 1752 | 1737 | 6.45  | 45  | 7.95 | 0.10 | 20  |
|    |        |         |            |      | 1647 | 6.38  | 45  | 7.87 | 0.10 | 30  |
|    |        |         |            |      | 1500 | 8.07  | 45  | 9.82 | 0.13 | 32  |
|    |        |         |            |      | 1300 | 2.83  | 40  | 4.26 | 0.05 | 21  |
|    |        |         |            |      | 1150 | 2.20  | 38  | 3.59 | 0.04 | 21  |
|    |        |         |            |      | 950  | 0.40  | 24  | 1.27 | 0.01 | 89  |
|    |        |         |            |      | 850  | 1.02  | 36  | 1.82 | 0.02 | 22  |
|    |        |         |            |      | 750  | 0.57  | 36  | 1.04 | 0.01 | 29  |
|    |        |         |            |      | 650  | 0.78  | 36  | 1.41 | 0.01 | 22  |
|    |        |         |            |      | 550  | 0.45  | 34  | 0.90 | ND   | ND  |
|    |        |         |            |      | 450  | 0.64  | 35  | 1.20 | 0.01 | 69  |
|    |        |         |            |      | 350  | 1.18  | 38  | 1.90 | 0.02 | 59  |
|    |        |         |            |      | 300  | 0.86  | 41  | 1.26 | ND   | ND  |
|    |        |         |            |      | 250  | 0.76  | 40  | 1.14 | ND   | ND  |
|    |        |         |            |      | 200  | ND    | ND  | ND   | ND   | ND  |
|    |        |         |            |      | 150  | 0.95  | 53  | 0.84 | 0.02 | 26  |
|    |        |         |            |      | 100  | 0.73  | 66  | 0.37 | 0.01 | 29  |
|    |        |         |            |      | 80   | 0.60  | 55  | 0.48 | 0.00 | 100 |
|    |        |         |            |      | 60   | 0.55  | 60  | 0.37 | ND   | ND  |
|    |        |         |            |      | 40   | 0.24  | 48  | 0.26 | 0.00 | 16  |
|    |        |         |            |      | 30   | ND    | ND  | ND   | ND   | ND  |
|    |        |         |            |      | 20   | ND    | ND  | ND   | 0.00 | 2   |
| 61 | 59.753 | -45.112 | 19/06/2014 | 151  | 136  | 12.68 | 68  | 6.04 | 0.21 | 43  |
|    |        |         |            |      | 120  | 9.71  | 65  | 5.12 | 0.16 | 27  |
|    |        |         |            |      | 100  | 6.10  | 63  | 3.52 | 0.10 | 23  |
|    |        |         |            |      | 70   | 7.81  | 71  | 3.24 | 0.13 | 29  |
|    |        |         |            |      | 50   | 11.0  | 70  | 4.65 | 0.18 | 35  |
|    |        |         |            |      | 25   | 9.90  | 70  | 4.23 | 0.16 | 32  |
| 63 | 59.434 | -45.666 | 19/06/2014 | 1563 | 1558 | 4.38  | 48  | 4.71 | 0.07 | 19  |
|    |        |         |            |      | 1300 | 3.09  | 45  | 3.76 | 0.05 | 17  |
|    |        |         |            |      | 1096 | 2.57  | 44  | 3.24 | 0.04 | 16  |
|    |        |         |            |      | 850  | 2.04  | 44  | 2.59 | 0.03 | 16  |



|    |        |         |            |      |      |      |     |      |      |    |
|----|--------|---------|------------|------|------|------|-----|------|------|----|
|    |        |         |            |      | 500  | 3.27 | 49  | 3.37 | 0.05 | 24 |
|    |        |         |            |      | 400  | 2.90 | 52  | 2.67 | 0.05 | 27 |
|    |        |         |            |      | 300  | 3.13 | 56  | 2.45 | 0.05 | 29 |
|    |        |         |            |      | 200  | 3.31 | 62  | 2.05 | 0.05 | 35 |
|    |        |         |            |      | 100  | 4.99 | 70  | 2.18 | 0.08 | 46 |
|    |        |         |            |      | 70   | 5.08 | 69  | 2.25 | 0.08 | 42 |
|    |        |         |            |      | 40   | 2.62 | 69  | 1.20 | 0.04 | 34 |
| 64 | 59.068 | -46.083 | 20/06/2014 | 2517 | 2502 | 6.58 | 46  | 7.67 | 0.11 | 18 |
|    |        |         |            |      | 2401 | 4.16 | 44  | 5.22 | 0.07 | 16 |
|    |        |         |            |      | 2151 | 0.64 | 46  | 0.74 | 0.01 | 9  |
|    |        |         |            |      | 2001 | 1.65 | 44  | 2.06 | 0.03 | 14 |
|    |        |         |            |      | 1800 | 1.48 | 46  | 1.73 | 0.02 | 14 |
|    |        |         |            |      | 1601 | 1.44 | 41  | 2.05 | 0.02 | 12 |
|    |        |         |            |      | 1400 | 1.35 | 42  | 1.85 | 0.02 | 11 |
|    |        |         |            |      | 1150 | 1.23 | 46  | 1.47 | 0.02 | 13 |
|    |        |         |            |      | 1050 | 0.56 | 45  | 0.70 | 0.01 | 11 |
|    |        |         |            |      | 900  | 0.85 | 48  | 0.93 | 0.01 | 13 |
|    |        |         |            |      | 800  | 0.94 | 42  | 1.29 | 0.02 | 12 |
|    |        |         |            |      | 700  | 0.85 | 43  | 1.13 | 0.01 | 11 |
|    |        |         |            |      | 500  | 1.03 | 43  | 1.35 | 0.02 | 15 |
|    |        |         |            |      | 400  | 2.00 | 44  | 2.58 | 0.03 | 16 |
|    |        |         |            |      | 320  | 2.58 | 46  | 3.05 | 0.04 | 19 |
|    |        |         |            |      | 200  | 1.65 | 48  | 1.75 | 0.03 | 20 |
|    |        |         |            |      | 150  | 1.28 | 50  | 1.29 | 0.02 | 19 |
|    |        |         |            |      | 100  | 0.52 | 53  | 0.46 | 0.01 | 26 |
|    |        |         |            |      | 50   | 0.16 | 100 | 0.00 | 0.00 | 17 |
|    |        |         |            |      | 35   | 0.35 | 79  | 0.09 | 0.01 | 13 |
|    |        |         |            |      | 25   | 0.01 | 100 | 0.00 | 0.00 | 4  |
|    |        |         |            |      | 15   | ND   | ND  | ND   | ND   | ND |
| 68 | 56.913 | -47.419 | 21/06/2014 | 3586 | 3638 | 32.8 | 48  | 35.9 | 0.53 | 22 |
|    |        |         |            |      | 3399 | 3.22 | 57  | 2.42 | 0.05 | 17 |
|    |        |         |            |      | 2500 | 0.99 | 53  | 0.87 | 0.02 | 11 |
|    |        |         |            |      | 1700 | 1.08 | 51  | 1.03 | 0.02 | 13 |
|    |        |         |            |      | 1400 | 1.23 | 56  | 0.95 | 0.02 | 15 |
|    |        |         |            |      | 900  | 0.70 | 58  | 0.51 | 0.01 | 13 |
|    |        |         |            |      | 350  | 1.11 | 55  | 0.92 | 0.02 | 19 |
|    |        |         |            |      | 101  | 1.23 | 68  | 0.59 | 0.02 | 20 |
|    |        |         |            |      | 50   | 0.86 | 82  | 0.18 | 0.01 | 25 |
|    |        |         |            |      | 35   | 0.47 | 82  | 0.10 | 0.01 | 19 |
|    |        |         |            |      | 30   | 0.83 | 100 | 0.00 | 0.01 | 20 |
|    |        |         |            |      | 20   | 0.44 | 100 | 0.00 | 0.01 | 17 |
| 69 | 55.841 | -48.093 | 23/06/2014 | 3741 | 3726 | 29.3 | 50  | 29.8 | 0.47 | 20 |
|    |        |         |            |      | 3700 | 29.1 | 50  | 28.8 | 0.47 | 20 |
|    |        |         |            |      | 3500 | 0.01 | 34  | 0.02 | 0.00 | 13 |
|    |        |         |            |      | 3249 | 1.28 | 48  | 1.36 | 0.02 | 12 |
|    |        |         |            |      | 2800 | 1.20 | 54  | 1.03 | 0.02 | 13 |
|    |        |         |            |      | 2399 | 1.08 | 49  | 1.11 | 0.02 | 12 |
|    |        |         |            |      | 2100 | 0.78 | 52  | 0.71 | 0.01 | 12 |
|    |        |         |            |      | 1800 | 0.84 | 51  | 0.79 | 0.01 | 11 |
|    |        |         |            |      | 1600 | 0.88 | 54  | 0.75 | 0.01 | 13 |

|    |        |         |            |      |      |       |     |      |      |    |
|----|--------|---------|------------|------|------|-------|-----|------|------|----|
|    |        |         |            |      | 1400 | 0.95  | 56  | 0.74 | 0.02 | 14 |
|    |        |         |            |      | 1100 | 0.94  | 56  | 0.73 | 0.02 | 16 |
|    |        |         |            |      | 801  | 1.07  | 56  | 0.86 | 0.02 | 15 |
|    |        |         |            |      | 501  | 1.06  | 56  | 0.83 | 0.02 | 15 |
|    |        |         |            |      | 180  | 1.69  | 57  | 1.29 | 0.03 | 20 |
|    |        |         |            |      | 130  | 1.82  | 58  | 1.29 | 0.03 | 21 |
|    |        |         |            |      | 100  | 1.74  | 60  | 1.15 | 0.03 | 21 |
|    |        |         |            |      | 70   | 1.82  | 63  | 1.09 | 0.03 | 18 |
|    |        |         |            |      | 40   | 1.37  | 74  | 0.47 | 0.02 | 18 |
|    |        |         |            |      | 25   | 0.86  | 79  | 0.23 | 0.01 | 14 |
|    |        |         |            |      | 15   | 0.95  | 69  | 0.42 | 0.02 | 13 |
| 71 | 53.692 | -49.433 | 24/06/2014 | 3700 | 3736 | 55.5  | 62  | 33.5 | 0.90 | 26 |
|    |        |         |            |      | 3500 | 2.85  | 59  | 1.95 | 0.05 | 19 |
|    |        |         |            |      | 3000 | 1.05  | 58  | 0.75 | 0.02 | 15 |
|    |        |         |            |      | 2400 | 0.77  | 53  | 0.67 | 0.01 | 13 |
|    |        |         |            |      | 1200 | 0.62  | 62  | 0.37 | 0.01 | 11 |
|    |        |         |            |      | 800  | 0.58  | 64  | 0.33 | 0.01 | 11 |
|    |        |         |            |      | 500  | 0.68  | 69  | 0.30 | 0.01 | 12 |
|    |        |         |            |      | 250  | 0.37  | 68  | 0.17 | 0.01 | 11 |
|    |        |         |            |      | 150  | 0.41  | 75  | 0.14 | 0.01 | 14 |
|    |        |         |            |      | 100  | 0.38  | 70  | 0.16 | 0.01 | 15 |
|    |        |         |            |      | 60   | 0.22  | 88  | 0.03 | 0.00 | 9  |
|    |        |         |            |      | 50   | 0.45  | 100 | 0.00 | 0.01 | 11 |
|    |        |         |            |      | 40   | 0.05  | 60  | 0.03 | 0.00 | 4  |
|    |        |         |            |      | 30   | ND    | ND  | ND   | 0.00 | 0  |
|    |        |         |            |      | 20   | 0.11  | 36  | 0.19 | 0.00 | 1  |
| 77 | 53.000 | -51.100 | 26/06/2014 | 2558 | 2543 | 6.07  | 60  | 4.08 | 0.10 | 28 |
|    |        |         |            |      | 2450 | 5.62  | 60  | 3.82 | 0.09 | 28 |
|    |        |         |            |      | 2400 | 5.69  | 60  | 3.80 | 0.09 | 28 |
|    |        |         |            |      | 2100 | 1.87  | 52  | 1.76 | 0.03 | 18 |
|    |        |         |            |      | 1900 | 1.85  | 51  | 1.78 | 0.03 | 18 |
|    |        |         |            |      | 1700 | 1.67  | 56  | 1.30 | 0.03 | 19 |
|    |        |         |            |      | 1500 | 1.43  | 54  | 1.21 | 0.02 | 18 |
|    |        |         |            |      | 1300 | 1.49  | 56  | 1.16 | 0.02 | 17 |
|    |        |         |            |      | 1200 | 1.83  | 58  | 1.31 | 0.03 | 21 |
|    |        |         |            |      | 1100 | 1.26  | 58  | 0.90 | 0.02 | 20 |
|    |        |         |            |      | 1000 | 1.49  | 64  | 0.83 | 0.02 | 23 |
|    |        |         |            |      | 700  | 1.87  | 62  | 1.17 | 0.03 | 23 |
|    |        |         |            |      | 400  | 1.86  | 62  | 1.12 | 0.03 | 28 |
|    |        |         |            |      | 150  | 3.14  | 68  | 1.47 | 0.05 | 40 |
|    |        |         |            |      | 100  | 2.61  | 67  | 1.29 | 0.04 | 40 |
|    |        |         |            |      | 80   | 1.13  | 69  | 0.50 | 0.02 | 32 |
|    |        |         |            |      | 60   | 1.00  | 73  | 0.38 | 0.02 | 26 |
|    |        |         |            |      | 40   | 1.22  | 28  | 3.15 | 0.02 | 8  |
|    |        |         |            |      | 30   | 0.39  | 55  | 0.32 | 0.01 | 3  |
|    |        |         |            |      | 15   | 0.20  | 42  | 0.28 | 0.00 | 2  |
| 78 | 51.989 | -53.817 | 27/06/2014 | 383  | 371  | 117.4 | 70  | 50.5 | 1.90 | 95 |
|    |        |         |            |      | 290  | 36.7  | 68  | 17.0 | 0.59 | 67 |
|    |        |         |            |      | 250  | 57.3  | 69  | 25.9 | 0.93 | 86 |
|    |        |         |            |      | 140  | 19.9  | 66  | 10.3 | 0.32 | 51 |

|    |      |    |      |      |    |
|----|------|----|------|------|----|
| 36 | 0.39 | 50 | 0.40 | 0.01 | 5  |
| 10 | 0.41 | 51 | 0.39 | 0.01 | 34 |
